# Supplementary material for: Neuronal HLH‐30/TFEB modulates peripheral mitochondrial fragmentation to improve thermoresistance in Caenorhabditis elegans
Source: PubMed Central journal article supplement (PMC10014052; doi:10.1111/acel.13741), 2022-11-23
Supplement: ACEL-22-e13741-s001.pdf [file ACEL-22-e13741-s001.pdf]

# Supplemental Figure 1

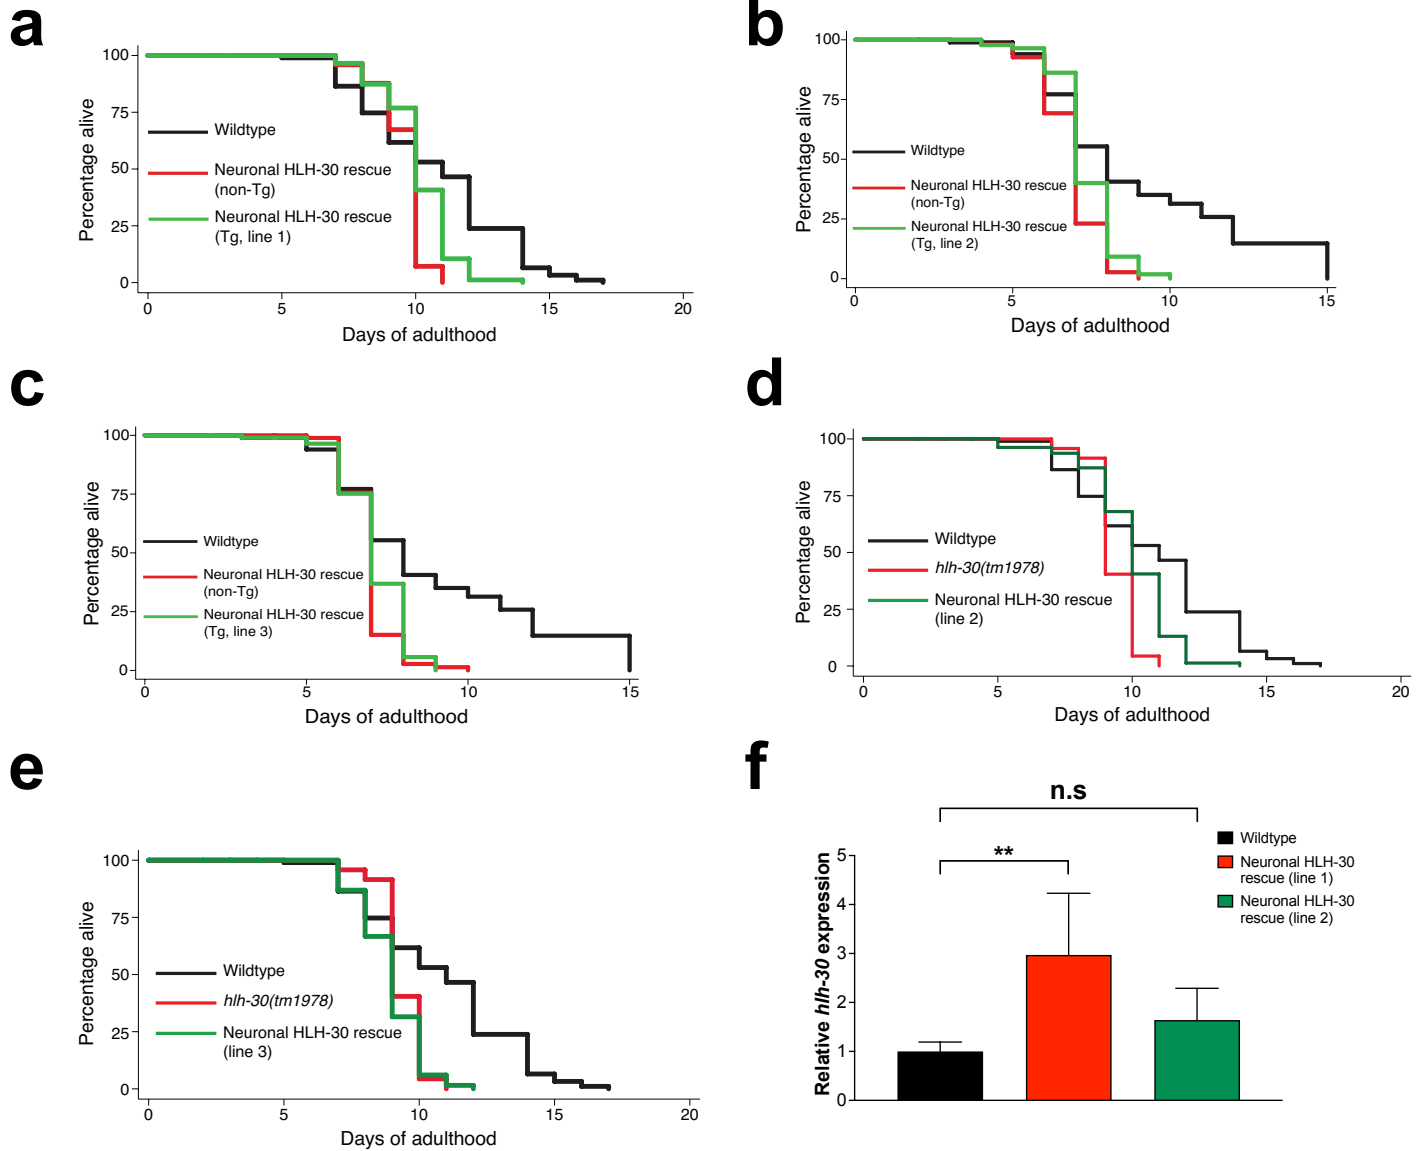

**Supplemental Figure 1. Neuronal HLH-30/TFEB does not regulate normal lifespan.**

Lifespan analyses of *hlh-30(tm1978)* mutants (non-transgenic (non-Tg) siblings and *hlh-30(tm1978)*) rescued with **(a to c)** extrachromosomal (Tg, transgenic) and **(d and e)** integrated arrays driving HLH-30/TFEB expression in neurons on OP50 at 25°C. Animals were developed at 20°C and shifted to 25°C on OP50 from day 1 of adulthood. Data are representatives of **(a)** 4 , **(b and c)** single, and **(d and e)** 3 independent replicates, and comparisons were made by Mantel-Cox log-rank. Further details about lifespan analyses are provided in Supplemental Table 1. **(f)** Relative *hlh-30* expression levels of wildtype and independently-derived lines 1 and 2 of neuronal HLH-30/TFEB rescued animals which respectively exhibited absence and presence of lifespan extension in comparison to *hlh-30(tm1978)* mutants. Animals were developed at 20°C to day 1 of adulthood on OP50. Data is representative of 3 independent replicates and comparisons were made by Kruskal-Wallis (expression normalized to wildtype and presented as mean  $\pm$  S.D; n.s,  $p \geq 0.05$ ; \*\*,  $p < 0.01$ )

# Supplemental Figure 2

**a**

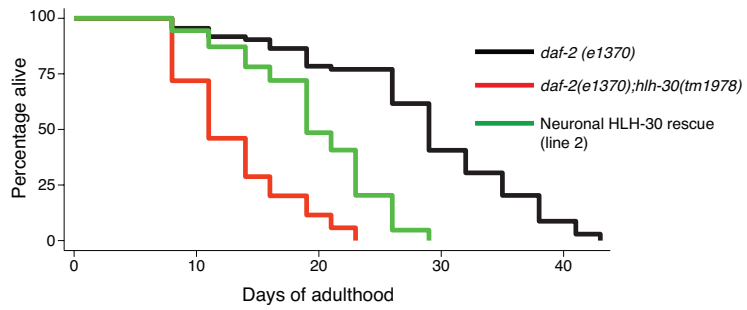

**b**

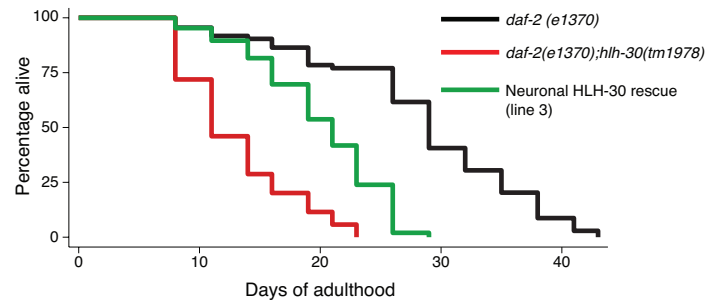

**c**

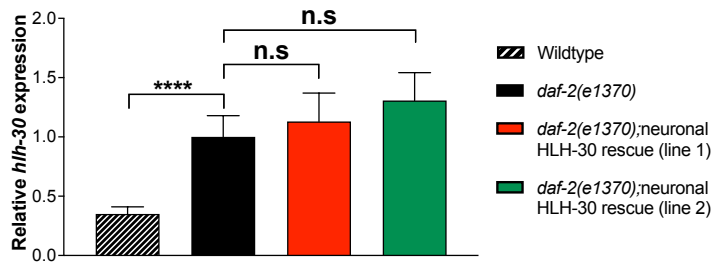

## Supplemental Figure 2. Neuronal HLH-30/TFEB regulates longevity.

**(a and b)** Lifespan analyses of *daf-2(e1370)*, *daf-2(e1370);hlh-30(tm1978)*, and neuronal HLH-30/TFEB rescued *daf-2(e1370);hlh-30(tm1978)* animals fed OP50 at 25°C. Animals were developed at 20°C and shifted to 25°C on OP50 from day 1 of adulthood. Data are representatives of 3 independent replicates, and comparisons were made by Mantel-Cox log-rank. Further details about lifespan analyses are provided in Supplemental Table 2. **(c)** Relative *hlh-30* expression levels of wildtype, *daf-2(e1370)*, and independently-derived lines 1 and 2 of neuronal HLH-30/TFEB rescued *daf-2(e1370);hlh-30(tm1978)* animals developed at 20°C to day 1 of adulthood on OP50. Data is representative of 3 independent replicates and comparisons were made by one-way ANOVA (expression normalized to *daf-2(e1370)* and presented as mean  $\pm$  S.D; n.s,  $p \geq 0.05$ ; \*\*\*\*,  $p < 0.0001$ ).



# Supplemental Figure 3

**a**

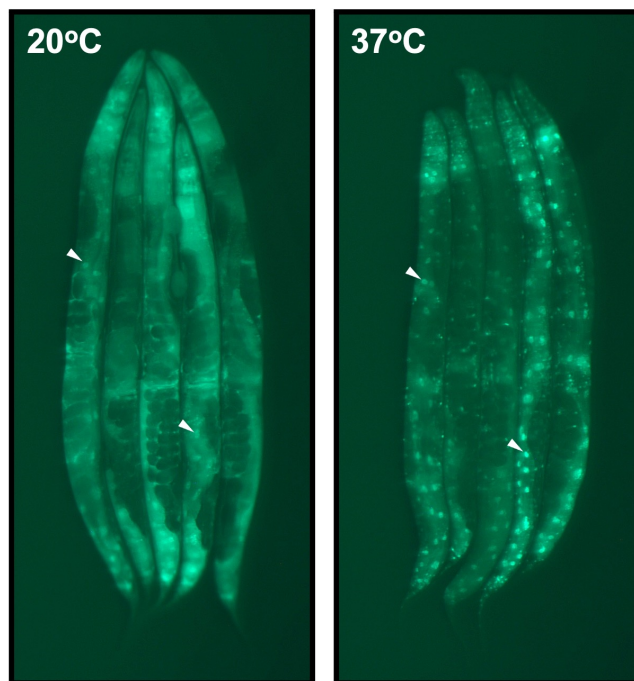

**b**

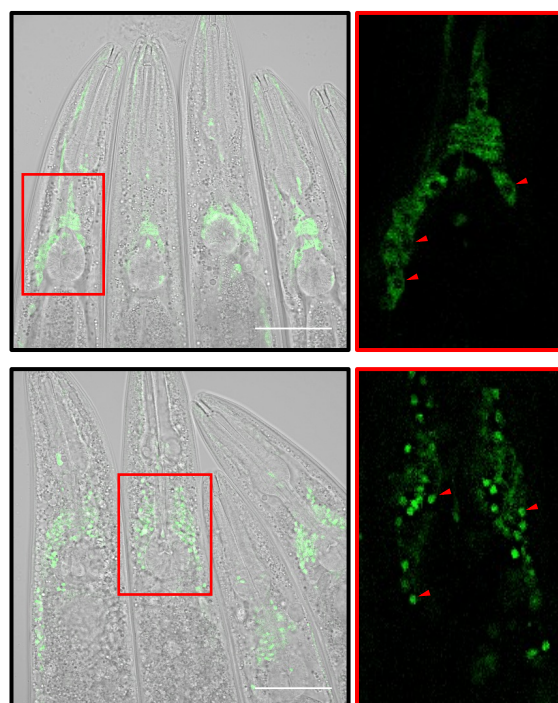

**c**

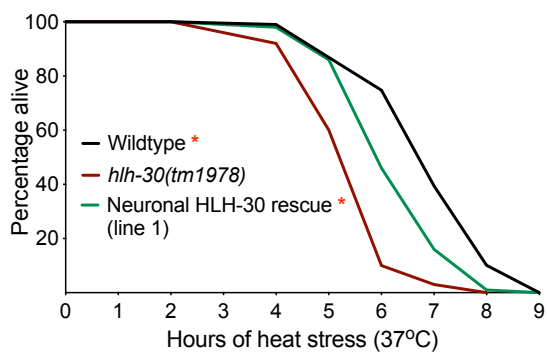

**d**

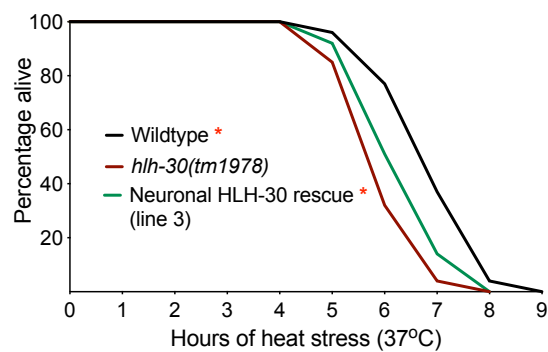

**e**

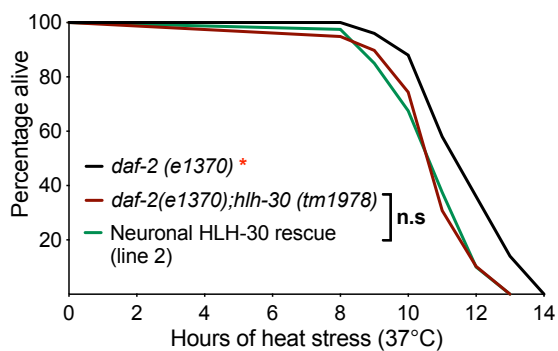

**f**

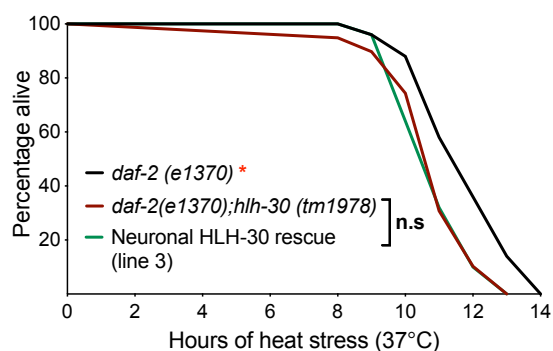

**g**

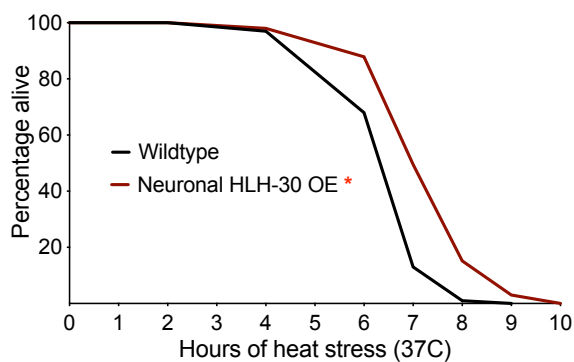

**Supplemental Figure 3. Neuronal HLH-30/TFEB mediates thermoresistance in normal but not longevity-promoting conditions.**

(a) *hlh-30(tm1978)* mutants ubiquitously rescued with HLH-30::GFP were developed at 20°C to day 1 of adulthood and imaged at 20°C and after 3 hours of heat stress at 37°C. Arrowheads indicate intestinal nuclear enrichment of HLH-30::GFP. (b) *hlh-30(tm1978)* mutants neuronally rescued with HLH-30::GFP were developed at 20°C to day 1 of adulthood and imaged for head neurons at 20°C and after 3 hours of heat stress at 37°C. Neuronal nuclei are indicated by red arrows in enlarged images on the right. Scale bars = 20 μM. Survival analyses of neuronal HLH-30/TFEB rescued animals in comparison to their (c and d) wildtype and *hlh-30(tm1978)* and (e and f) *daf-2(e1370)* and *daf-2(e1370);hlh-30(tm1978)* controls at 37°C heat stress. (g) Survival analyses of neuronal HLH-30/TFEB overexpressing (OE) animals in comparison to their wildtype controls at 37°C heat stress. Animals were developed at 20°C and shifted to heat stress at 37°C on day 1 of adulthood. Data are representatives of (c and d) single experiments and (e to g) 2 independent replicates and comparisons were made by Mantel-Cox log-rank ( $n = 90-100/\text{strain}$ ; n.s.,  $p \geq 0.05$ ; \*,  $p < 0.05$ ; in comparison to (c and d) *hlh-30(tm1978)*, (e and f) *daf-2(e1370);hlh-30(tm1978)* or (g) wildtype animals.

# Supplemental Figure 4

**a**

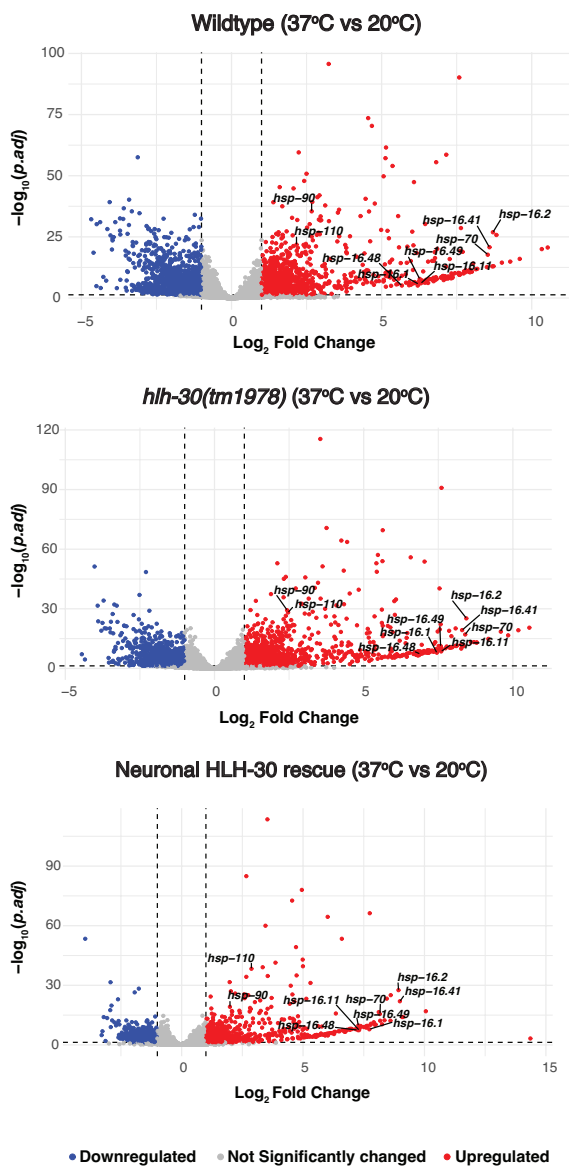

**c**

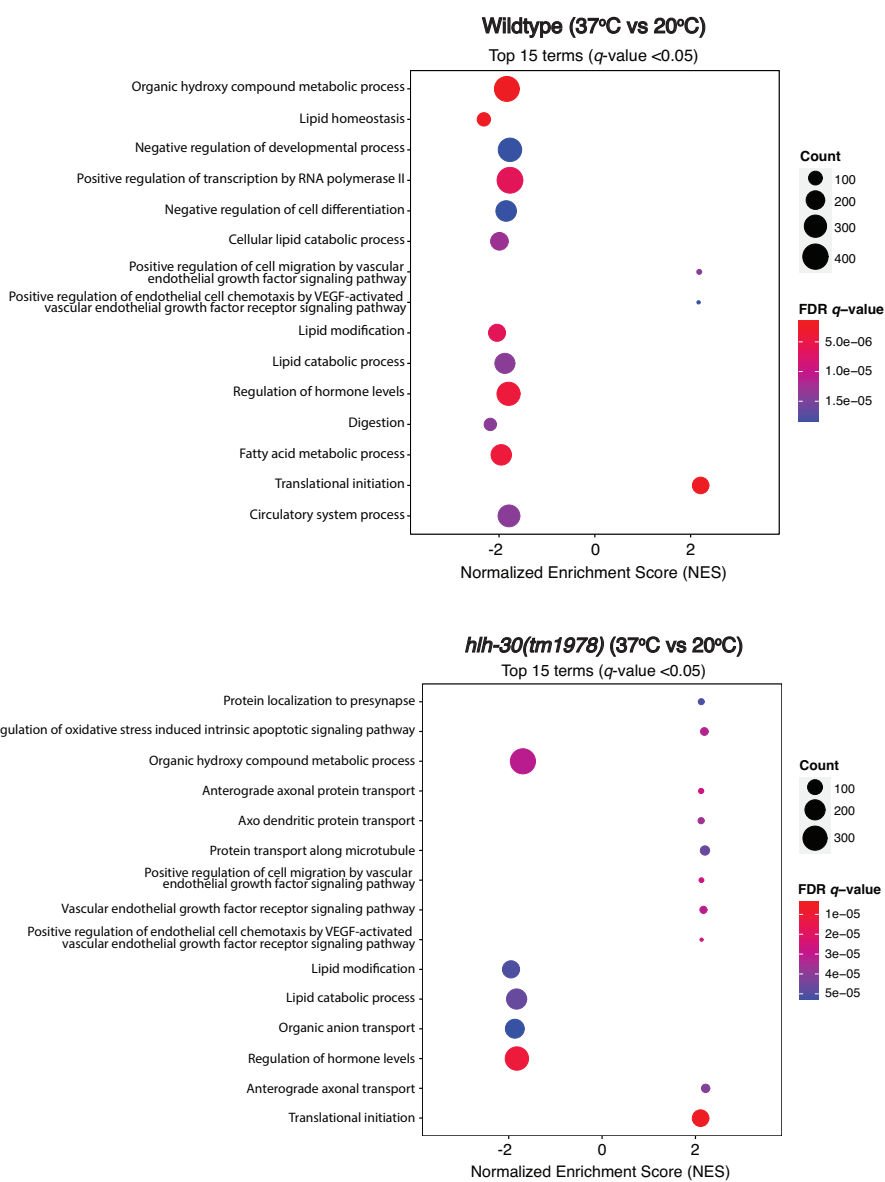

**b**

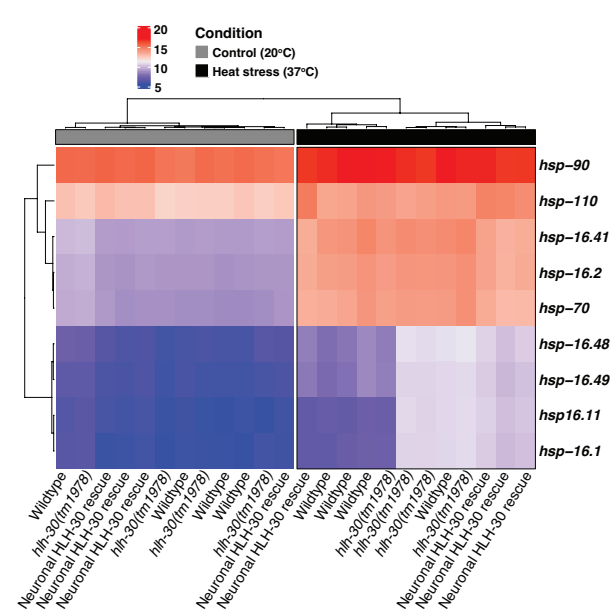

**Neuronal HLH-30 rescue (37°C vs 20°C)**

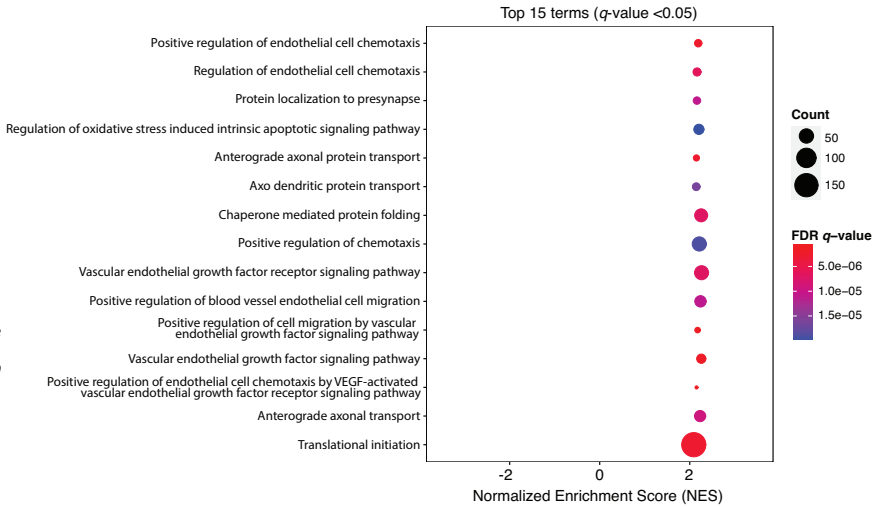

**Supplemental Figure 4. Heat stress-induced transcriptional changes in wildtype, *hlh-30(tm1978)*, and neuronal HLH-30/TFEB rescued animals.**

**(a)** Volcano plots indicating the upregulation of heat stress-induced heat shock protein (*hsp*) genes in wildtype, *hlh-30(tm1978)*, and neuronal HLH-30/TFEB rescued animals from 37°C (heat stress) in comparison to 20°C (control conditions). Horizontal dotted line indicates adjusted  $p$ -value  $<0.05$ . Vertical dotted lines indicate  $>1.0$  and  $<1.0$   $\text{Log}_2$  fold change. **(b)** Heat map showing the regularized log transformed gene counts clustering (rlog) of animals within 20°C (control) and 37°C (heat stress) conditions regardless of genotypes, and the upregulation of significant (adjusted  $p$ -value  $<0.05$ ,  $\text{Log}_2$  fold change  $>1$ ) *hsp* genes in heat stressed groups. **(c)** Gene set enrichment analysis plots of the top 15 most significantly-enriched Gene Ontology Biological Processes terms ( $q <0.05$ ) from wildtype, *hlh-30(tm1978)*, and neuronal HLH-30/TFEB rescued animals at 37°C (heat stress) in comparison to 20°C (control conditions). Negative and positive normalized enrichment scores (NES) indicate respective down- and upregulation of enriched processes with heat stress. Animals from 4 independent replicates were developed at 20°C to day 1 of adulthood and harvested for RNA after 3 hrs of further growth at 20°C or 37°C.

# Supplemental Figure 5

**a**

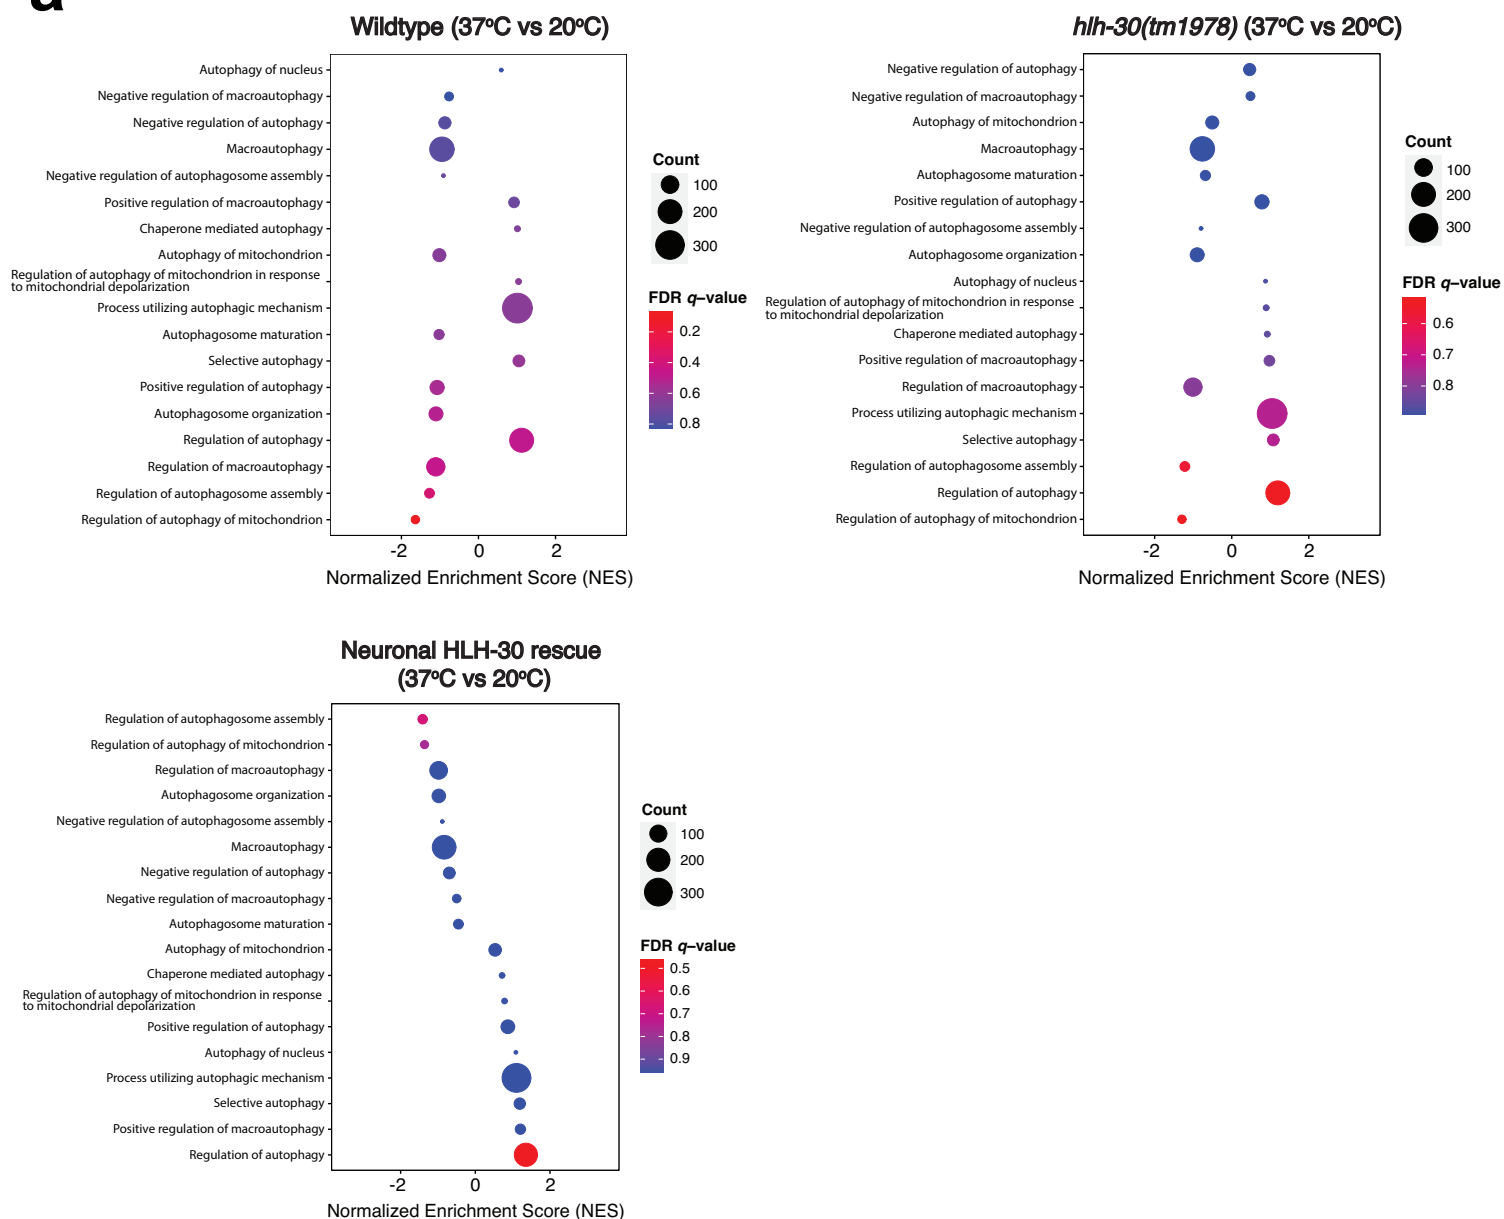

**b**

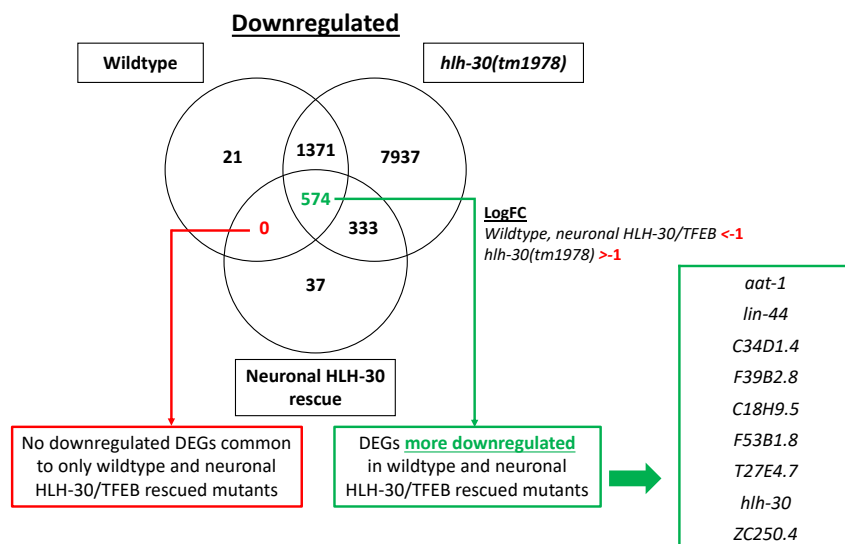

**Supplemental Figure 5. Analysis of heat stress-induced autophagy-related changes and downregulated differentially expressed genes.**

**(a)** Gene set enrichment analysis plots of Gene Ontology Biological Processes terms related to autophagy from wildtype, *hlh-30(tm1978)*, and neuronal HLH-30/TFEB rescued animals at 37°C (heat stress) in comparison to 20°C (control conditions). Note that although negative and positive normalized enrichment scores (NES) indicate respective down- and upregulation of indicated autophagic processes, none of these were significantly enriched with heat stress exposure across genotypes ( $q \geq 0.05$ ). **(b)** Genes downregulated by 37°C (heat stress) in comparison to 20°C (control conditions) for each genotype were overlapped to extract significant heat stress-specific differentially expressed genes (adjusted  $p$ -value  $< 0.05$ ) unique to or more downregulated ( $\text{Log}_2$  fold change (LogFC) thresholds applied as indicated) in wildtype and neuronal HLH-30/TFEB rescued animals than *hlh-30(tm1978)* mutants. Animals from 4 independent replicates were developed at 20°C to day 1 of adulthood and harvested for RNA after 3 hrs of further growth at 20°C (control conditions) or 37°C (heat stress).

# Supplemental Figure 6

**a**

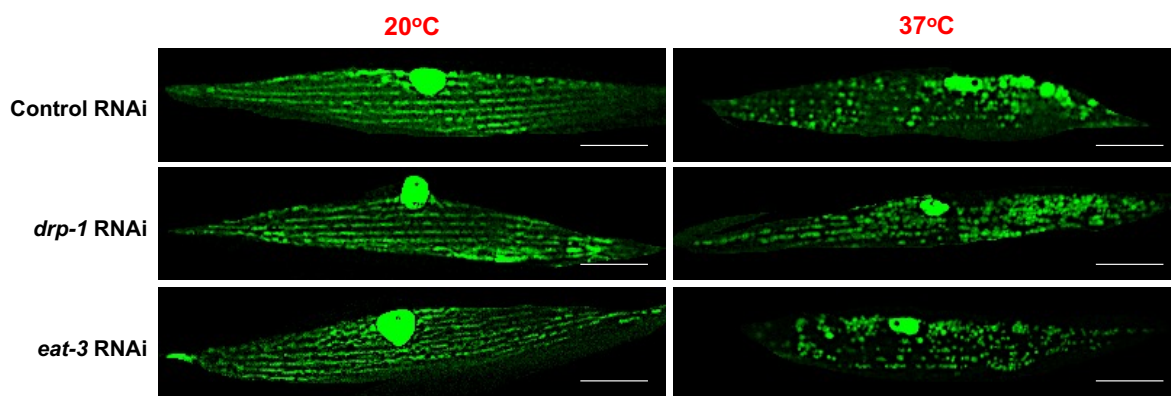

**b**

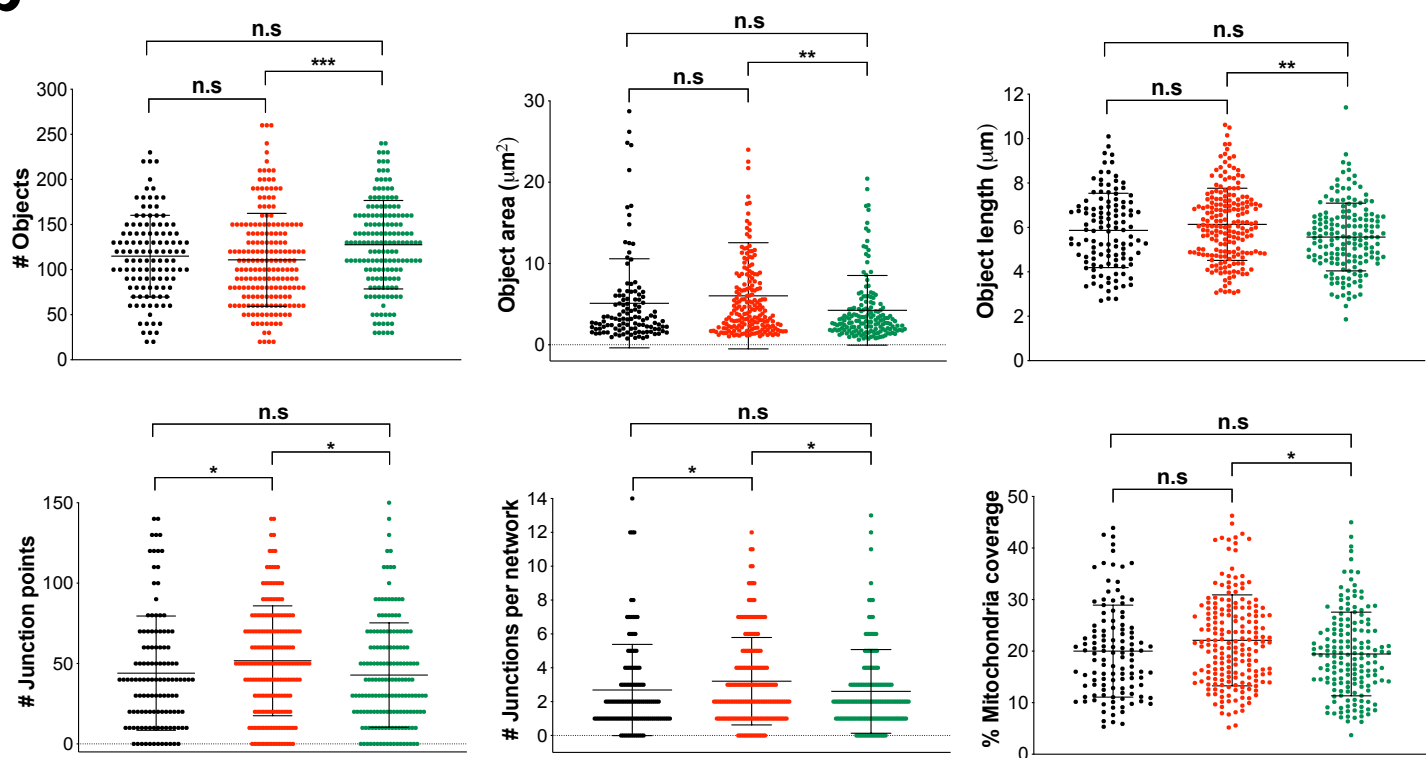

• Control RNAi    • *drp-1* RNAi    • *eat-3* RNAi

**c**

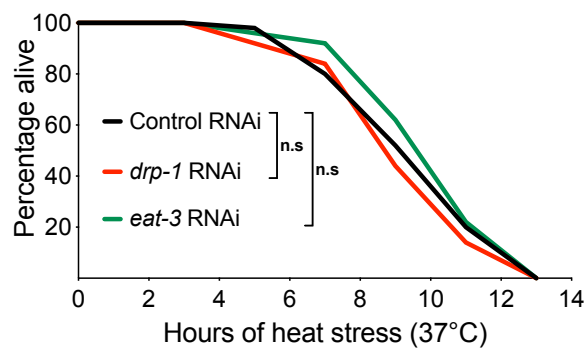

**d**

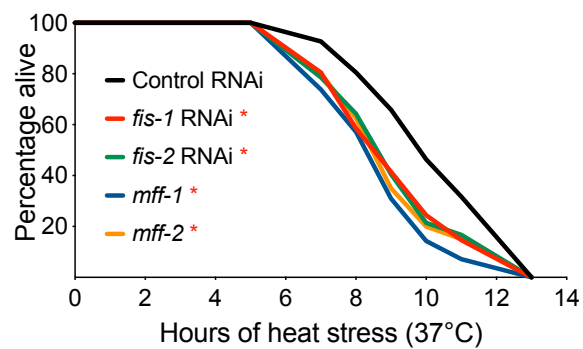

**Supplemental Figure 6. Mitochondrial fragmentation is mechanistically important for thermoresistance.**

**(a)** Representative images of muscle mitochondrial morphology with the body wall muscle mitochondrial reporter (Mito::GFP) in wildtype animals fed control RNAi (*L4440*) or RNAi against *drp-1* or *eat-3* at 20°C (control conditions) or after 5 hrs heat stress at 37°C heat stress, and **(b)** corresponding analysis of mitochondrial connectivity after heat stress. Data are representatives of 3 independent replicates ( $n = 30$ , number of ROIs = 118 - 193) and comparisons were made by Mann-Whitney for each mitochondrial feature (presented as mean  $\pm$  S.D; n.s,  $p \geq 0.05$ ; \*,  $p < 0.05$ ; \*\*,  $p < 0.01$ ; \*\*\*,  $p < 0.001$ ). Survival analyses of neuronal HLH-30/TFEB animals fed control RNAi (*L4440*) or RNAi against **(c)** *drp-1* and *eat-3*, or **(d)** *fis-1*, *fis-2*, *mff-1*, and *mff-2* at 37°C heat stress. Data are representatives of 2 independent replicates (**a**,  $n = 90$ /RNAi; **b**,  $n = 84 - 87$ /RNAi) and comparisons were made by Mantel-Cox log-rank (\*,  $p < 0.05$ ; in comparison to control RNAi). All animals were developed at 20°C to the L4 larval stage on OP50, transferred onto bacteria expressing RNAi for 48 hrs, and exposed to 37°C heat stress for **(a and b)** 5 hrs or **(c and d)** until death.



# Supplemental Figure 7

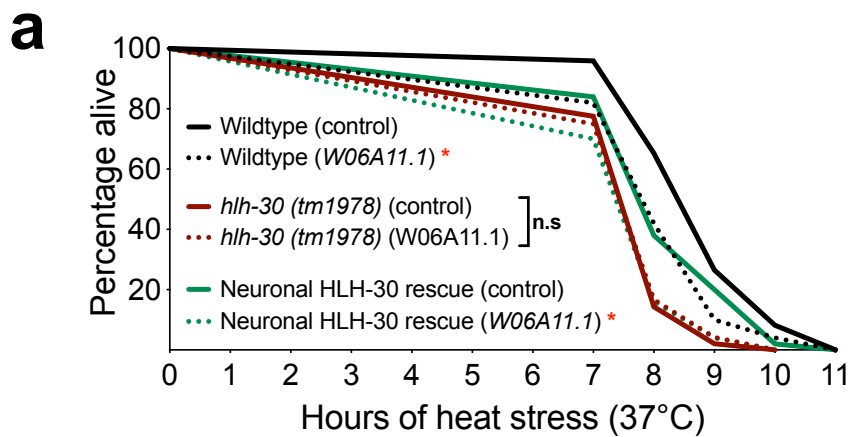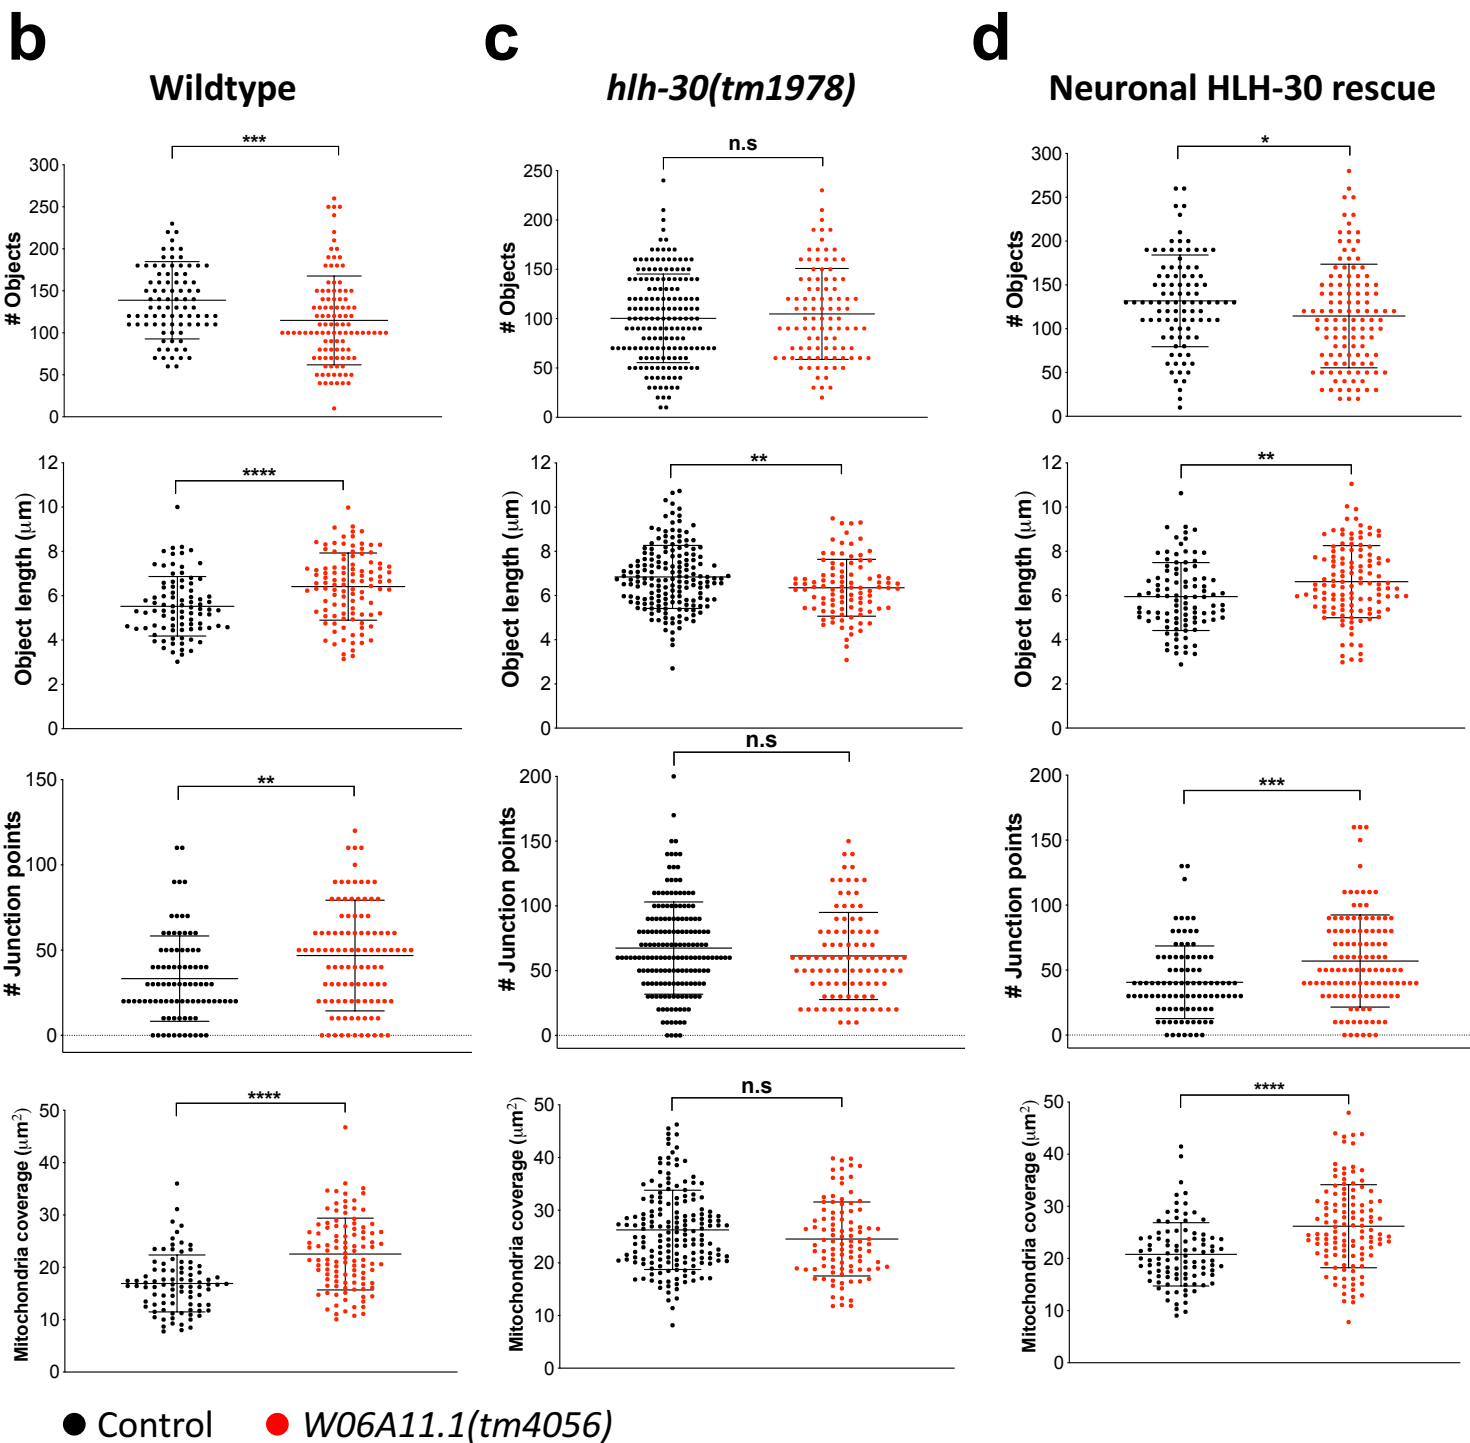

**Supplemental Figure 7. Neuronal HLH-30/TFEB mediates thermoresistance through W06A11.1-dependent peripheral mitochondrial fragmentation.**

(a) Survival analyses of wildtype, *hlh-30(tm1978)*, and neuronal HLH-30/TFEB rescued animals fed control RNAi (*L4440*, solid lines) or RNAi against *W06A11.1* (dotted lines) at 37°C heat stress. Animals developed at 20°C to day 1 of adulthood on OP50 were transferred onto bacteria expressing RNAi, grown at 25°C for 48 hr, and exposed to 37°C heat stress until death. Data is representative of 2 independent replicates ( $n = 83 - 99/\text{RNAi}/\text{strain}$ ) and comparisons were made by Mantel-Cox log-rank (n.s,  $p \geq 0.05$ ; \*,  $p < 0.05$ ; in comparison to control RNAi). (b to d) Analysis of mitochondrial connectivity in the absence and presence of *W06A11.1(tm4056)* loss of function after 37°C heat stress for 3 hrs in (b) wildtype, (c) *hlh-30(tm1978)* loss of function mutants, and (d) neuronal HLH-30/TFEB rescued animals developed at 20°C to day 1 of adulthood. Data are representatives of 3 independent replicates (per strain;  $n = 30$ , number of ROIs = 88 – 171) and comparisons were made by Mann-Whitney for each mitochondrial feature (presented as mean  $\pm$  S.D; n.s,  $p \geq 0.05$ ; \*,  $p < 0.05$ ; \*\*,  $p < 0.01$ ; \*\*\*,  $p < 0.001$ ; \*\*\*\*,  $p < 0.0001$ ).

# Supplemental Figure 8

**a**

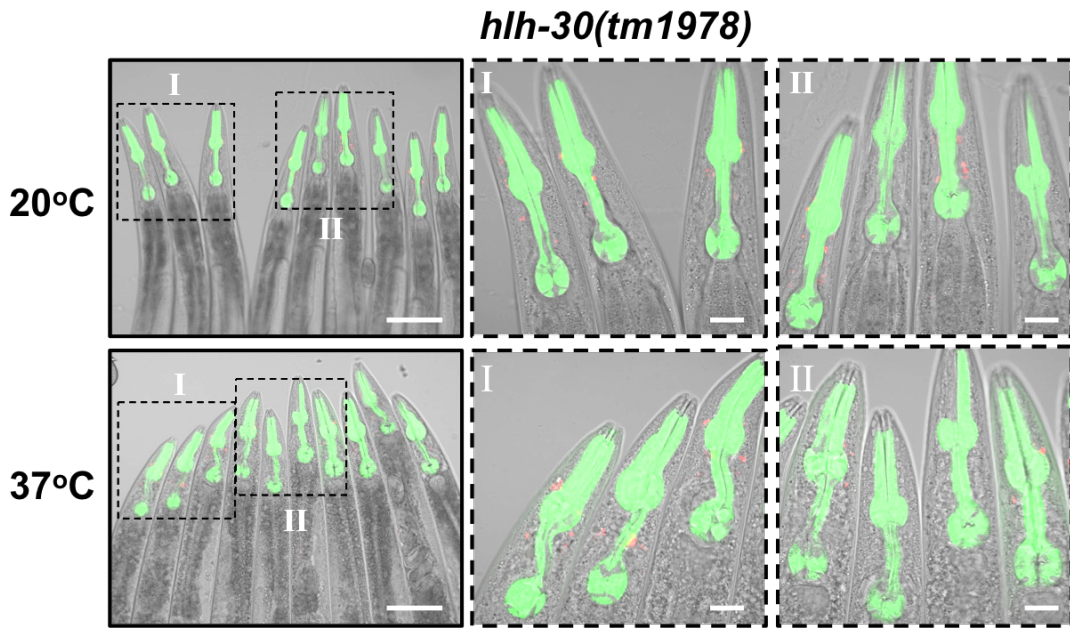

**b**

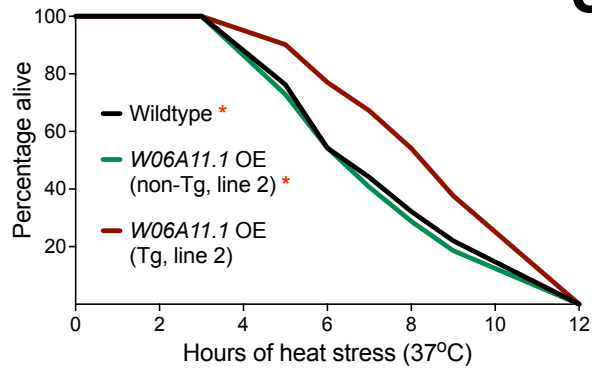

**c**

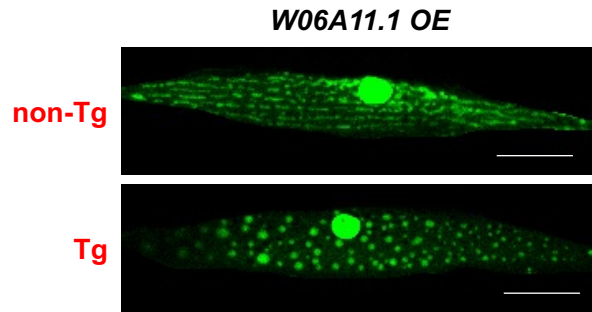

**d**

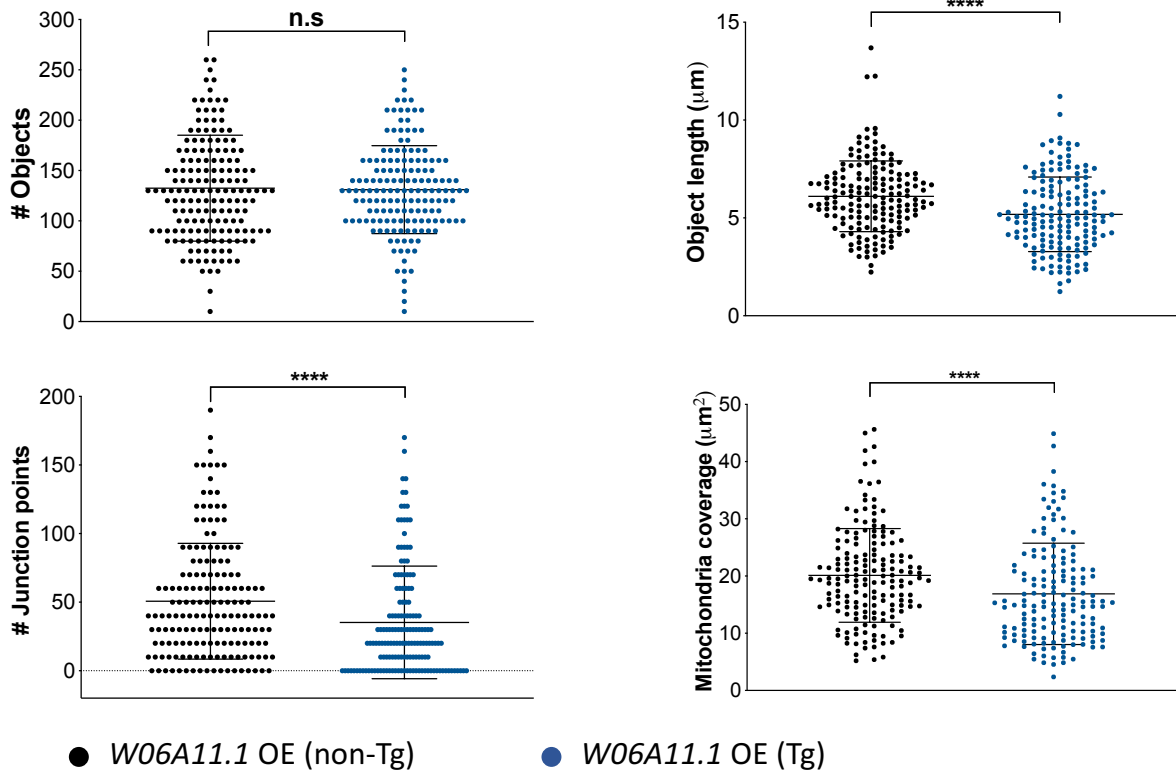

**Supplemental Figure 8. W06A11.1 mediates thermoresistance through mitochondrial fragmentation.**

**(a)** *hlh-30(tm1978)* mutants overexpressing extrachromosomal W06A11.1::DsRed at 20°C (control conditions) and after 37°C heat stress for 5 hrs. Scale bars = 100 μM, images in left column; scale bars = 20 μM, enlarged insets of head regions (I and II). **(b)** Survival analyses of wildtype, with wildtype animals overexpressing extrachromosomal W06A11.1::DsRed (*W06A11.1* OE (*Tg*)) and their non-transgenic (non-Tg) siblings at 37°C heat stress. Data is from an independent replicate and comparisons were made by Mantel-Cox log-rank ( $n = 60/\text{strain}$ ; \*,  $p < 0.05$ ; comparison of wildtype and *W06A11.1* OE (non-Tg) animals to *W06A11.1* OE (*Tg*)). **(c)** Representative images of muscle mitochondrial morphology with the body wall muscle mitochondrial reporter (Mito::GFP) in *W06A11.1* OE Tg and non-Tg siblings at 20°C. **(d)** Analysis of mitochondrial connectivity in *W06A11.1* OE Tg and non-Tg siblings at 20°C. Data are representatives of 2 independent replicates (per strain;  $n = 30$ , number of ROIs = 157 – 167) and comparisons were made by Mann-Whitney for each mitochondrial feature (presented as mean  $\pm$  S.D; n.s,  $p \geq 0.05$ ; \*\*\*\*,  $p < 0.0001$ ). All animals were developed at 20°C to day 1 of adulthood and where indicated, were further exposed to 37°C heat stress for **(a)** 5 hrs, **(b)** until death, or **(c and d)** 3 hrs.

# Supplemental Figure 9

**a**

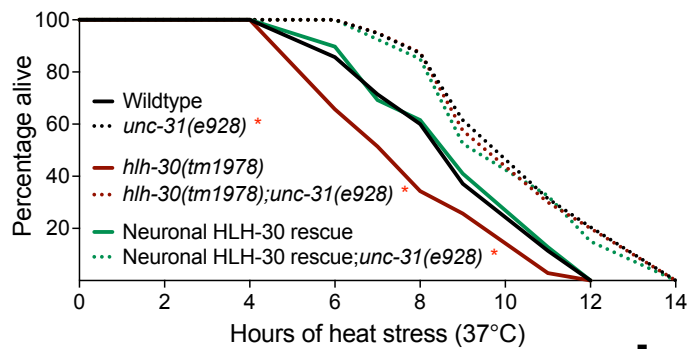

**b**

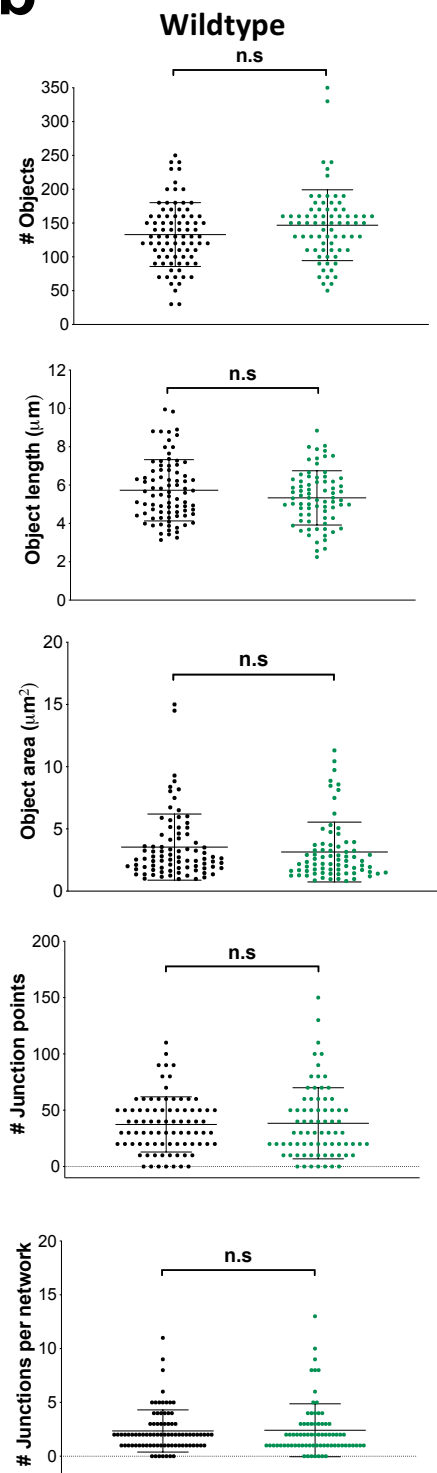

**c**

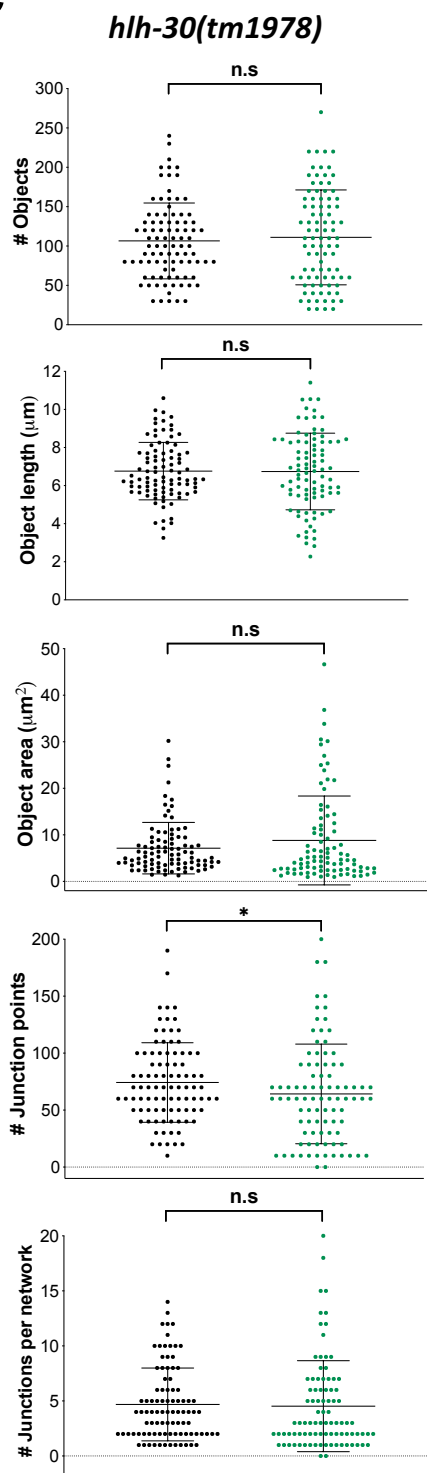

**d**

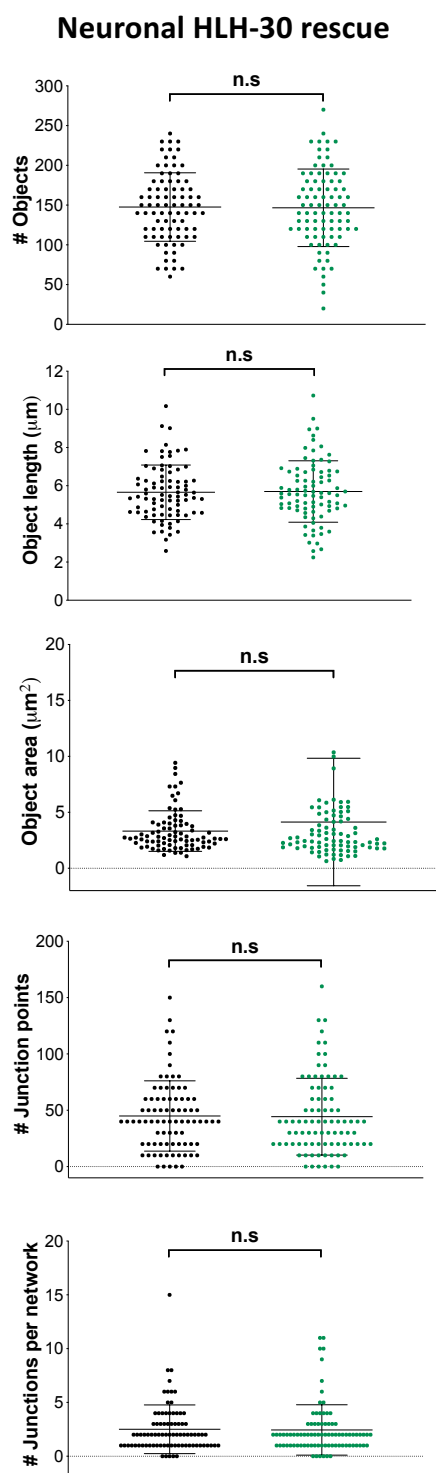

● Control ● *unc-31(e928)*

**Supplemental Figure 9. Neuronal HLH-30/TFEB does not mediate mitochondrial fragmentation-dependent thermoresistance through dense core vesicle (DCV) release.**

**(a)** Survival analyses of wildtype, *hlh-30(tm1978)*, and neuronal HLH-30/TFEB rescued animals in the absence (solid lines) and presence (dotted lines) of *unc-31(e928)* loss of function at 37°C heat stress. Animals were developed at 20°C to day 1 of adulthood and exposed to 37°C heat stress until death. Data is representative of 3 – 4 independent replicates and comparisons were made by Mantel-Cox log-rank ( $n = 113 - 169/\text{strain}$ ; \*,  $p < 0.05$ ; comparisons of *unc-31(e928)* to control per genotype). **(b to d)** Analysis of mitochondrial connectivity in the absence and presence of *unc-31(e928)* loss of function in **(b)** wildtype, **(c)** *hlh-30(tm1978)*, and **(d)** neuronal HLH-30/TFEB rescued animals developed at 20°C to day 1 of adulthood after 37°C heat stress for 3 hrs. Data are representatives of 3 independent replicates (per strain;  $n = 30$ , number of ROIs = 75 – 92) and comparisons were made by Mann-Whitney for each mitochondrial feature (presented as mean  $\pm$  S.D; n.s,  $p \geq 0.05$ ).

# Supplemental Figure 10

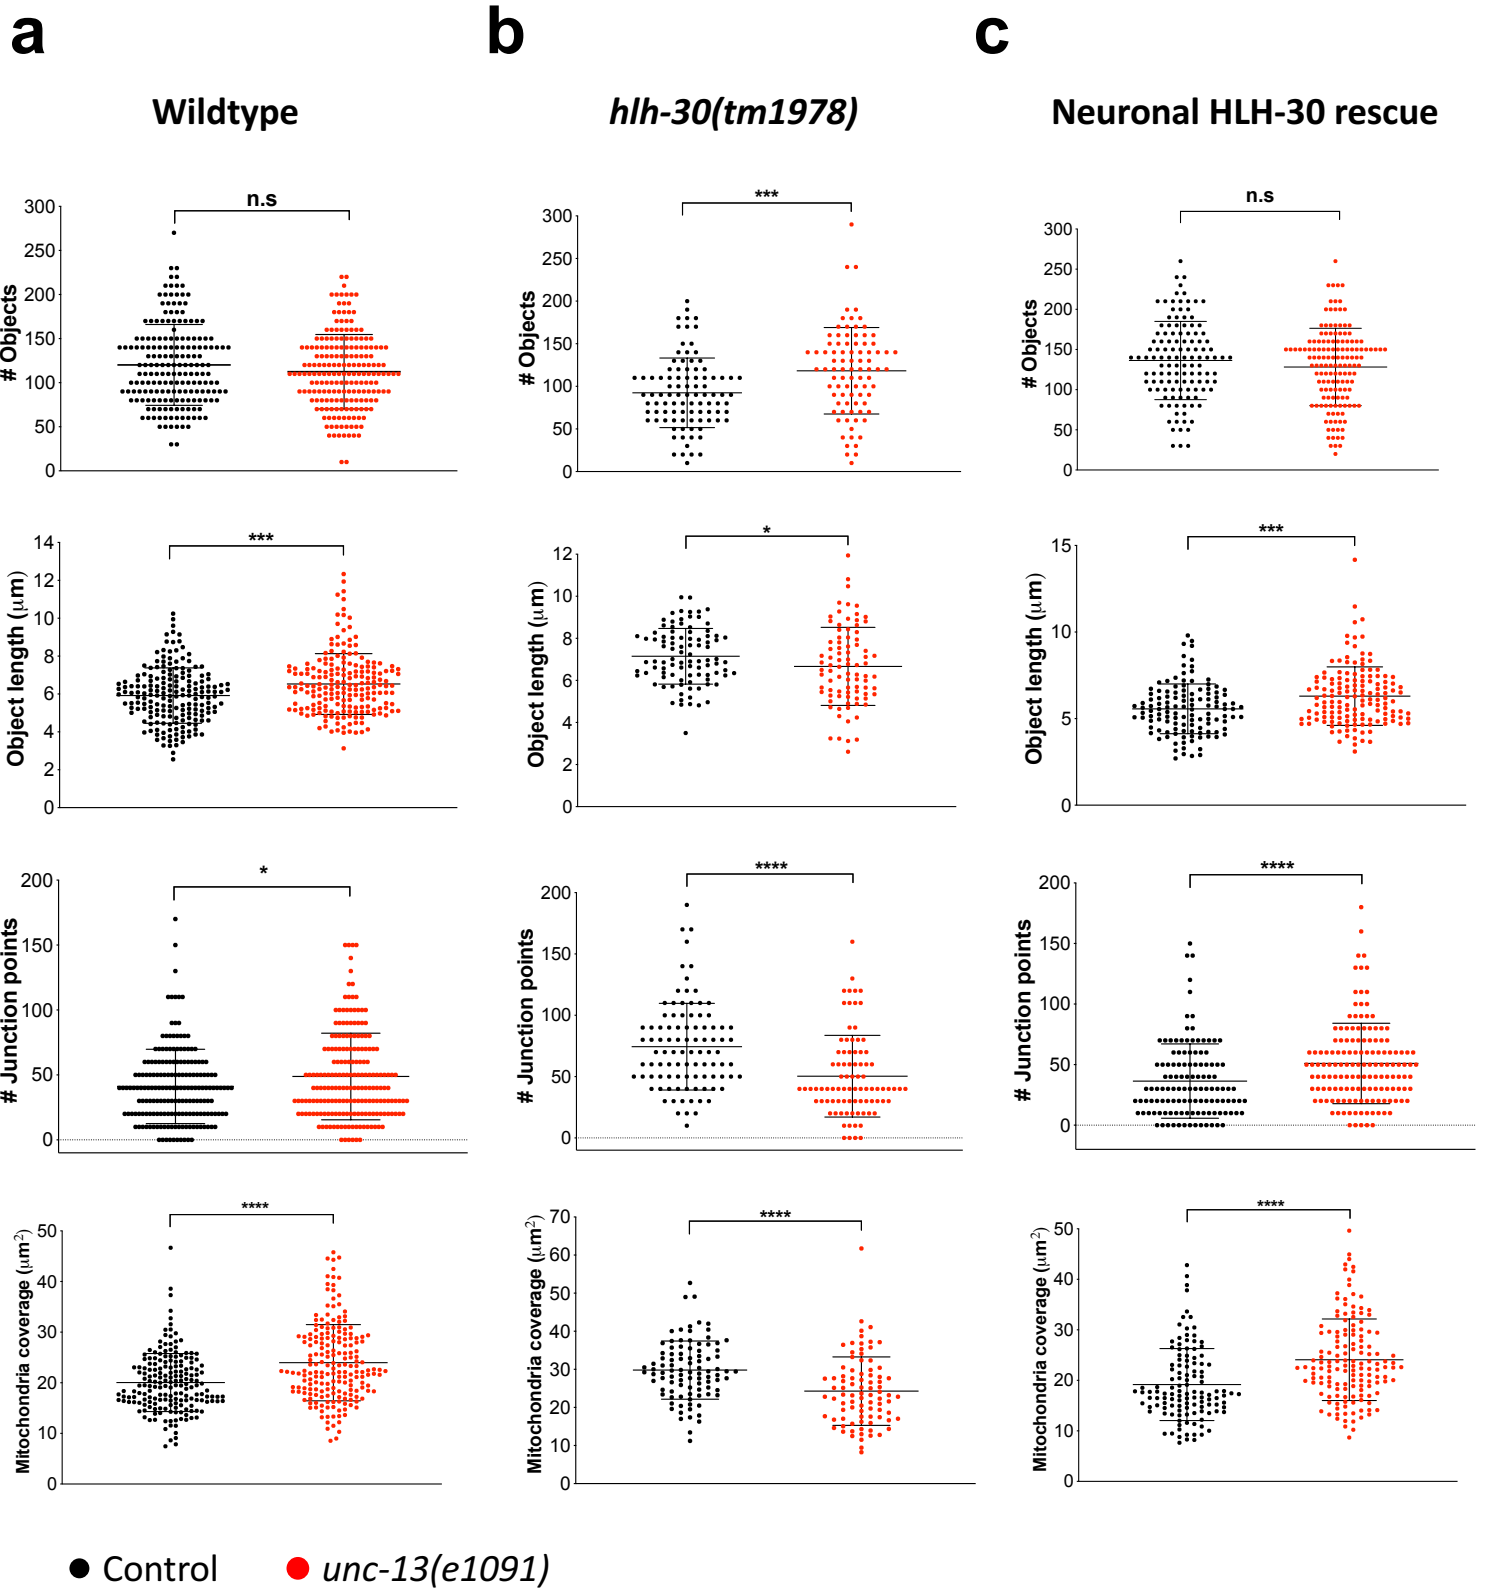

**Supplemental Figure 10. Defective neurotransmission increases heat stress-induced mitochondria fragmentation in *hlh-30(tm1978)* mutants.**

Analysis of mitochondrial connectivity in the absence and presence of *unc-13(e1091)* loss of function in (a) wildtype, (b) *hlh-30(tm1978)*, and (c) neuronal HLH-30/TFEB rescued animals developed at 20°C to day 1 of adulthood after 37°C heat stress for 3 hrs. Data are representatives of 3 - 5 independent replicates (per strain;  $n = 30 - 50$ ; number of ROIs = 87 – 196) and comparisons were made by Mann-Whitney for each mitochondrial feature (presented as mean  $\pm$  S.D; n.s,  $p \geq 0.05$ ; \*,  $p < 0.05$ ; \*\*\*,  $p < 0.001$ ; \*\*\*\*,  $p < 0.0001$ ).



# Supplemental Figure 11

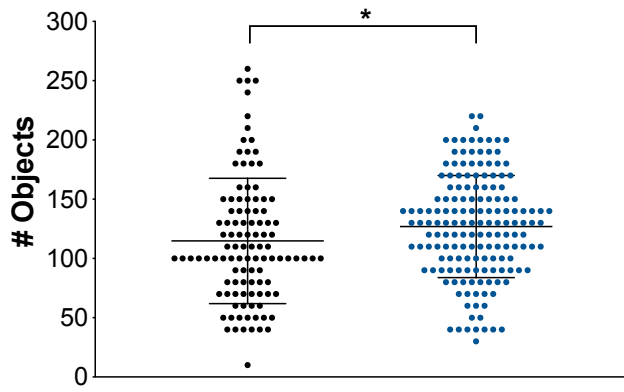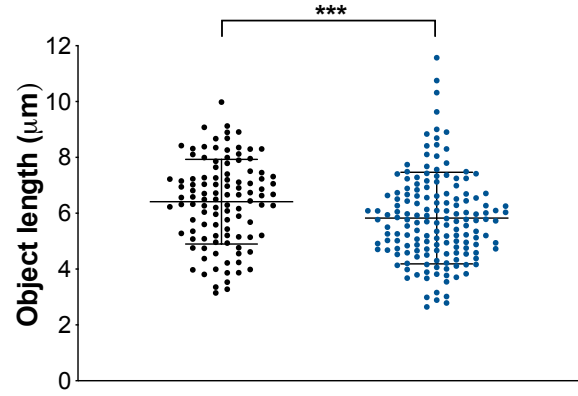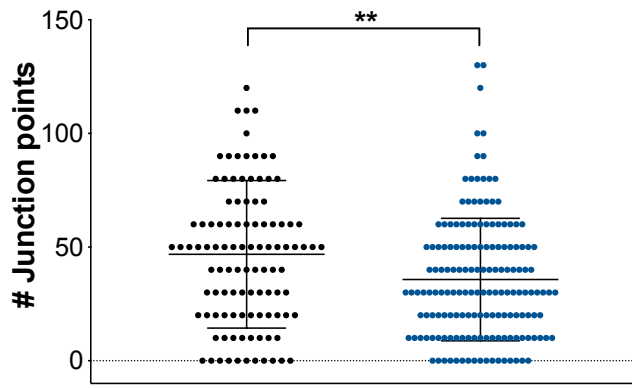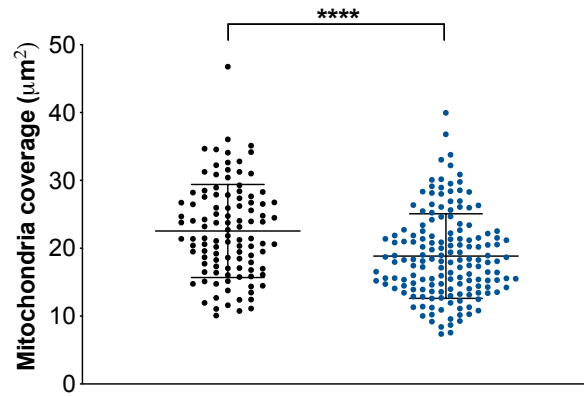

● *W06A11.1(tm4056)*

● *W06A11.1(tm4056);unc-13(e1091)*

**Supplemental Figure 11. W06A11.1 mediates peripheral mitochondrial fragmentation by regulating neurotransmission.**

Comparison of mitochondrial connectivity between *W06A11.1(tm4056)* and *W06A11.1(tm4056);unc-13(e1091)* animals developed at 20°C to day 1 of adulthood after 37°C heat stress for 3 hrs. Data are representatives of 2 - 3 independent replicates (per strain;  $n = 30$ ; number of ROIs = 107 – 161) and comparisons were made by Mann-Whitney for each mitochondrial feature (presented as mean  $\pm$  S.D; n.s,  $p \geq 0.05$ ; \*,  $p < 0.05$ ; \*\*,  $p < 0.01$ ; \*\*\*,  $p < 0.001$ ; \*\*\*\*,  $p < 0.0001$ ).

# Supplemental Table 1

| N2      |      | <i>hlh-30(tm1978)</i> |         |    |                    | Neuronal HLH-30 rescue strains |         |      |                                       |          |          |
|---------|------|-----------------------|---------|----|--------------------|--------------------------------|---------|------|---------------------------------------|----------|----------|
| Mean LS | EO   | Strain                | Mean LS | EO | % Difference to N2 | Strain                         | Mean LS | EO   | % Difference to <i>hlh-30(tm1978)</i> | p Value  | Figure # |
| 9.02    | 68   | LRL81 (Non Tg)        | 6.9     | 83 | -23.53             | LRL81 (Tg)                     | 7.34    | 68   | 6.42%                                 | 0.0012   |          |
| 12.99   | 47   | LRL81 (Non Tg)        | 9.57    | 74 | -26.33%            | LRL81 (Tg)                     | 10.16   | 73   | 6.17%                                 | 0.0070   |          |
| 10.79   | 93   | LRL81 (Non Tg)        | 9.58    | 98 | -11.21%            | LRL81 (Tg)                     | 10.14   | 86   | 5.85%                                 | < 0.0001 | S1a      |
| 9.48    | 74   | LRL81 (Non Tg)        | 8.44    | 92 | -0.10%             | LRL81 (Tg)                     | 8.96    | 71   | 6.16%                                 | 0.0086   |          |
| 9.02    | 57   | LRL82 (Non Tg)        | 6.86    | 88 | -23.95%            | LRL82 (Tg)                     | 7.32    | 65   | 6.70%                                 | 0.0027   | S1b      |
| 9.02    | 57   | LRL83 (Non Tg)        | 6.94    | 84 | -23.05%            | LRL83 (Tg)                     | 7.12    | 71   | 2.65%                                 | 0.0736   | S1c      |
| 12.99   | 47 * | LRL31                 | 9.46    | 59 | -27.17%            | LRL146 (Line 1)                | 9.71    | 77   | 2.64%                                 | 0.3818   |          |
| 10.79   | 93   | LRL31                 | 9.32    | 93 | -13.62%            | LRL146 (Line 1)                | 9.29    | 89   | -0.32%                                | 0.4978   | 1b       |
| 9.48    | 74   | LRL31                 | 7.7     | 88 | -18.78%            | LRL146 (Line 1)                | 7.91    | 86   | 2.73%                                 | 0.2631   |          |
| 12.99   | 47 * | LRL31                 | 9.46    | 59 | -27.17%            | LRL147 (Line 2)                | 10.36   | 62   | 9.51%                                 | < 0.0001 |          |
| 10.79   | 93   | LRL31                 | 9.32    | 93 | -13.62%            | LRL147 (Line 2)                | 9.98    | 77   | 7.02%                                 | < 0.0001 | S1d      |
| 9.48    | 74   | LRL31                 | 7.7     | 88 | -18.78%            | LRL147 (Line 2)                | 8.7     | 75   | 12.99%                                | < 0.0001 |          |
| 12.99   | 47 * | LRL31                 | 9.46    | 59 | -27.17%            | LRL148 (Line 3)                | 9.49    | 48 * | 0.32%                                 | 0.9957   |          |
| 10.79   | 93   | LRL31                 | 9.32    | 93 | -13.62%            | LRL148 (Line 3)                | 8.93    | 82   | -4.18%                                | 0.0424   | S1e      |
| 9.48    | 74   | LRL31                 | 7.7     | 88 | -18.78%            | LRL148 (Line 3)                | 7.56    | 75   | -1.82%                                | 0.5542   |          |

**Supplemental Table 1. Lifespan analyses of neuronal HLH-30/TFEB rescued animals in *hlh-30(tm1878)* background.** Animals were raised at 20°C and grown at 25°C on OP50. Where indicated (\*), low number of events observed (EO, <50) were due largely due to censoring of animals which were more susceptible to internal progeny hatching at 25°C. Statistical analyses: Mantel-Cox log-rank; Mean LS: Mean Lifespan. Refer to Supplemental Table 4 for additional strain information.

## Supplemental Table 2

| <i>daf-2(e1370)III</i> |    | <i>daf-2(e1379)III;<br/>hlh-30(tm1978)IV</i> |    |                                        | Neuronal HLH-30 rescue strains |         |      |                                                            |          |          |
|------------------------|----|----------------------------------------------|----|----------------------------------------|--------------------------------|---------|------|------------------------------------------------------------|----------|----------|
| Mean LS                | EO | Mean LS                                      | EO | % Difference to <i>daf-2(e1370)III</i> | Strain                         | Mean LS | EO   | % Difference to <i>daf-2(e1370)III;<br/>hlh-30(tm1978)</i> | p Value  | Figure # |
| 31.52                  | 95 | 15.28                                        | 69 | -51.52%                                | <b>LRL167</b><br>(Line 1)      | 18.8    | 70   | 23.04%                                                     | < 0.0001 |          |
| 28.35                  | 72 | 13.06                                        | 50 | -53.93%                                | <b>LRL167</b><br>(Line 1)      | 22.07   | 70   | 68.98%                                                     | < 0.0001 | 1c       |
| 33.67                  | 80 | 13.26                                        | 61 | -60.62%                                | <b>LRL167</b><br>(Line 1)      | 20.91   | 73   | 57.69%                                                     | < 0.0001 |          |
| 31.52                  | 95 | 15.28                                        | 69 | -51.52%                                | <b>LRL168</b><br>(Line 2)      | 19.35   | 84   | 26.64%                                                     | < 0.0001 |          |
| 28.35                  | 72 | 13.06                                        | 50 | -53.93%                                | <b>LRL168</b><br>(Line 2)      | 19.71   | 66   | 50.92%                                                     | < 0.0001 | S2a      |
| 33.67                  | 80 | 13.26                                        | 61 | -60.62%                                | <b>LRL168</b><br>(Line 2)      | 23.08   | 65   | 74.06%                                                     | < 0.0001 |          |
| 31.52                  | 95 | 15.28                                        | 69 | -51.52%                                | <b>LRL169</b><br>(Line 3)      | 18.07   | 61   | 18.26%                                                     | 0.0009   |          |
| 28.35                  | 72 | 13.06                                        | 50 | -53.93%                                | <b>LRL169</b><br>(Line 3)      | 19.69   | 52   | 52.35%                                                     | < 0.0001 | S2b      |
| 33.67                  | 80 | 13.26                                        | 61 | -60.62%                                | <b>LRL169</b><br>(Line 3)      | 19.16   | 39 * | 44.40%                                                     | < 0.0001 |          |

**Supplemental Table 2. Lifespan analyses of neuronal *hlh-30* rescued animals in *daf-2(e1370);hlh-30(tm1978)* background.** Animals were raised at 20°C and grown at 25°C on OP50. Where indicated (\*), low number of events observed (EO, <50) were due largely due to censoring of animals which were more susceptible to internal progeny hatching at 25°C. Statistical analyses: Mantel-Cox log-rank; Mean LS: Mean Lifespan. Refer to Supplemental Table 4 for additional strain information.

## Supplemental Table 3

| Strain                                   | Control RNAi |      |                                        |                | <i>daf-16</i> RNAi |      |                                        |                | Figure # |
|------------------------------------------|--------------|------|----------------------------------------|----------------|--------------------|------|----------------------------------------|----------------|----------|
|                                          | Mean LS      | EO   | % Difference to <i>daf-2(e1370)III</i> | <i>p</i> Value | Mean LS            | EO   | % Difference to <i>daf-2(e1370)III</i> | <i>p</i> Value |          |
| <i>daf-2(e1370)III</i>                   | 22.96        | 67   |                                        |                | 21.87              | 93   |                                        |                |          |
| <i>daf-2(e1379)III; hlh-30(tm1978)IV</i> | 12.47        | 36 * | -45.69                                 | < 0.0001       | 14.58              | 90   | -33.33                                 | < 0.0001       |          |
| Neuronal HLH-30 rescue (LRL167)          | 18.18        | 43 * | -20.82                                 | 0.0133         | 14.66              | 83   | -32.97                                 | < 0.0001       |          |
| <i>daf-2(e1370)III</i>                   | 31.24        | 82   |                                        |                | 20.16              | 74   |                                        |                | 1d       |
| <i>daf-2(e1379)III; hlh-30(tm1978)IV</i> | 15.05        | 37 * | -51.82                                 | < 0.0001       | 15.02              | 61   | -25.5                                  | < 0.0001       |          |
| Neuronal HLH-30 rescue (LRL167)          | 25.19        | 43 * | -19.37                                 | 0.0019         | 14.5               | 46 * | -28.08                                 | < 0.0001       |          |
| <i>daf-2(e1370)III</i>                   | 27.27        | 61   |                                        |                | 15.90              | 61   |                                        |                |          |
| <i>daf-2(e1379)III; hlh-30(tm1978)IV</i> | 13.09        | 20 * | -52                                    | < 0.0001       | 12.86              | 60   | -19.11                                 | < 0.0001       |          |
| Neuronal HLH-30 rescue (LRL167)          | 18.54        | 40 * | -32.01                                 | < 0.0001       | 12.92              | 57   | -18.74                                 | < 0.0001       |          |

### Supplemental Table 3. Lifespan analyses of neuronal *hlh-30* rescued animals in

***daf-2(e1370);hlh-30(tm1978)* background on *daf-16* RNAi.** Animals developed at 20°C on OP50 were transferred on day 1 of adulthood onto bacteria expressing RNAi and grown at 25°C. Where indicated (\*), low number of events observed (EO, <50) were largely due to censoring of animals which were more susceptible to internal progeny hatching at 25°C. Statistical analyses: Mantel-Cox log-rank; Mean LS: Mean Lifespan. Refer to Supplemental Table 4 for additional strain information.

# Supplemental Table 4

| Published strains used in this study |                                                                                                                                |                                                                  |
|--------------------------------------|--------------------------------------------------------------------------------------------------------------------------------|------------------------------------------------------------------|
| Strain Name                          | Genotype                                                                                                                       | Strain Origin                                                    |
| N2-CK                                | Wildtype                                                                                                                       | Hansen Lab                                                       |
| CF1041                               | <i>daf-2(e1370)III</i>                                                                                                         | Hansen Lab                                                       |
| FX1978                               | <i>hlh-30(tm1978)IV</i>                                                                                                        | National BioSource Project                                       |
| FX4056                               | <i>W06A11.1(tm4056)II</i>                                                                                                      | National BioSource Project                                       |
| CF1038                               | <i>daf-16(mu86)I</i>                                                                                                           | Caenorhabditis Genetics Center (CGC)                             |
| SD1347                               | <i>cls4251 [(pSAK2) myo-3p::GFP::LacZ::NLS + (pSAK4) myo-3p::mitochondrial GFP + dpy-20(+)]I</i>                               | Caenorhabditis Genetics Center (CGC)                             |
| RW1596                               | <i>myo-3(st386)V; stEx30 (myo-3p::GFP::myo-3 + rol-6(su1006))</i>                                                              | Caenorhabditis Genetics Center (CGC)                             |
| CB1091                               | <i>unc-13(e1091)I</i>                                                                                                          | Caenorhabditis Genetics Center (CGC)                             |
| DA509                                | <i>unc-31(e928)IV</i>                                                                                                          | Caenorhabditis Genetics Center (CGC)                             |
| New strains used in this study       |                                                                                                                                |                                                                  |
| Strain Name                          | Genotype                                                                                                                       | Comments                                                         |
| LRL131                               | <i>hlh-30(tm1978)IV</i>                                                                                                        | FX1978, 4X backcrossed to N2-CK                                  |
| LRL146                               | <i>daf-2(e1370)III; hlh-30(tm1978)IV</i>                                                                                       | LRL131 x CF1041                                                  |
| LRL172                               | <i>hlh-30(tm1978)IV;</i><br><i>llcEx31 (pLP11/hlh-30p::hlh-30::GFP::unc-54 3'UTR + pLP24/unc-122p::RFP)</i>                    | Refer to Methods for strain generation                           |
| LRL181                               | <i>hlh-30(tm1978)IV;</i><br><i>llcEx33(pLP27/rab-3p::hlh-30::GFP::3XFLAG::rab-3 3'UTR + pLP24/unc-122p::RFP)</i>               | Line 1; Refer to Methods for strain generation                   |
| LRL182                               | <i>hlh-30(tm1978)IV;</i><br><i>llcEx34(pLP27/rab-3p::hlh-30::GFP::3XFLAG::rab-3 3'UTR + pLP24/unc-122p::RFP)</i>               | Line 2; Refer to Methods for strain generation                   |
| LRL183                               | <i>hlh-30(tm1978)IV;</i><br><i>llcEx35(pLP27/rab-3p::hlh-30::GFP::3XFLAG::rab-3 3'UTR + pLP24/unc-122p::RFP)</i>               | Line 3; Refer to Methods for strain generation                   |
| LRL130                               | <i>hlh-30(tm1978)IV; daf-16(mu86)I</i>                                                                                         | LRL131 x CF1038                                                  |
| LRL136                               | <i>llcls2(pLP27/rab-3p::hlh-30::GFP::3XFLAG::rab-3 3'UTR + pLP24/unc-122p::RFP)</i>                                            | Refer to Methods for strain generation; 10X backcrossed to N2-CK |
| LRL137                               | <i>llcls3(pLP27/rab-3p::hlh-30::GFP::3XFLAG::rab-3 3'UTR + pLP24/unc-122p::RFP)</i>                                            | Refer to Methods for strain generation; 10X backcrossed to N2-CK |
| LRL138                               | <i>llcls4 (pLP27/rab-3p::hlh-30::GFP::3XFLAG::rab-3 3'UTR + pLP24/unc-122p::RFP)</i>                                           | Refer to Methods for strain generation; 10X backcrossed to N2-CK |
| LRL146                               | <i>hlh-30 (tm1978)IV;</i><br><i>llcls2(pLP27/rab-3p::hlh-30::GFP::3XFLAG::rab-3 3'UTR + pLP24/unc-122p::RFP)</i>               | LRL131 X LRL136 (Line 1)                                         |
| LRL147                               | <i>hlh-30 (tm1978)IV;</i><br><i>llcls3(pLP27/rab-3p::hlh-30::GFP::3XFLAG::rab-3 3'UTR + pLP24/unc-122p::RFP)</i>               | LRL131 X LRL137 (Line 2)                                         |
| LRL148                               | <i>hlh-30 (tm1978)IV;</i><br><i>llcls4(pLP27/rab-3p::hlh-30::GFP::3XFLAG::rab-3 3'UTR + pLP24/unc-122p::RFP)</i>               | LRL131 X LRL138 (Line 3)                                         |
| LRL167                               | <i>daf-2(e1370); hlh-30 (tm1978)IV;</i><br><i>llcls2(pLP27/rab-3p::hlh-30::GFP::3XFLAG::rab-3 3'UTR + pLP24/unc-122p::RFP)</i> | LRL146 X LRL146 (Line 1)                                         |
| LRL168                               | <i>daf-2(e1370); hlh-30 (tm1978)IV;</i><br><i>llcls3(pLP27/rab-3p::hlh-30::GFP::3XFLAG::rab-3 3'UTR + pLP24/unc-122p::RFP)</i> | LRL147 X LRL146 (Line 2)                                         |
| LRL169                               | <i>daf-2(e1370); hlh-30 (tm1978)IV;</i><br><i>llcls4(pLP27/rab-3p::hlh-30::GFP::3XFLAG::rab-3 3'UTR + pLP24/unc-122p::RFP)</i> | LRL148 X LRL146 (Line 3)                                         |
| LRL196                               | <i>hlh-30(tm1978)IV; daf-16(mu86)I;</i><br><i>llcls3(pLP27/rab-3p::hlh-30::GFP::3XFLAG::rab-3 3'UTR + pLP24/unc-122p::RFP)</i> | LRL147 x LRL130                                                  |
| LRL200                               | <i>cls4251 [(pSAK2) myo-3p::GFP::LacZ::NLS + (pSAK4) myo-3p::mitochondrial GFP + dpy-20(+)]I</i>                               | SD1347, 4X backcrossed to N2-CK                                  |

Supplemental Table 4. Strains used in the study

## Supplemental Table 4 (continued)

| New strains used in this study |                                                                                                                                                                                                                      |                                 |
|--------------------------------|----------------------------------------------------------------------------------------------------------------------------------------------------------------------------------------------------------------------|---------------------------------|
| Strain Name                    | Genotype                                                                                                                                                                                                             | Comments                        |
| LRL201                         | <i>hlh-30(tm1978)IV; cls4251 [(pSAK2) myo-3p::GFP::LacZ::NLS + (pSAK4) myo-3p::mitochondrial GFP + dpy-20(+)]I</i>                                                                                                   | LRL31 x LRL200                  |
| LRL204                         | <i>myo-3(st386)V; stEx30 (myo-3p::GFP::myo-3 + rol-6(su1006))</i>                                                                                                                                                    | RW1596, 4X backcrossed to N2-CK |
| LRL207                         | <i>W06A11.1(tm4056)II</i>                                                                                                                                                                                            | FX4056, 4X backcrossed to N2-CK |
| LRL208                         | <i>hlh-30(tm1978)IV; myo-3(st386)V; stEx30 (myo-3p::GFP::myo-3 + rol-6(su1006))</i>                                                                                                                                  | LRL31 x LRL204                  |
| LRL212                         | <i>hlh-30(tm1978)IV; llcls3(pLP27/rab-3p::hlh-30::GFP::3XFLAG::rab-3 3'UTR + pLP24/unc-122p::RFP); cls4251 [(pSAK2) myo-3p::GFP::LacZ::NLS + (pSAK4) myo-3p::mitochondrial GFP + dpy-20(+)]I</i>                     | LRL147 x LRL201                 |
| LRL216                         | <i>hlh-30(tm1978)IV; W06A11.1(tm4056)II</i>                                                                                                                                                                          | LRL31 x LRL207                  |
| LRL217                         | <i>hlh-30(tm1978)IV; llcls3(pLP27/rab-3p::hlh-30::GFP::3XFLAG::rab-3 3'UTR + pLP24/unc-122p::RFP); myo-3(st386)V; stEx30 (myo-3p::GFP::myo-3 + rol-6(su1006))</i>                                                    | LRL147 x LRL208                 |
| LRL218                         | <i>hlh-30(tm1978)IV; W06A11.1(tm4056)II; llcls3(pLP27/rab-3p::hlh-30::GFP::3XFLAG::rab-3 3'UTR + pLP24/unc-122p::RFP)</i>                                                                                            | LRL147 x LRL216                 |
| LRL219                         | <i>unc-13(e1091)I</i>                                                                                                                                                                                                | CB1091, 4X backcrossed to N2-CK |
| LRL220                         | <i>unc-31(e928)IV</i>                                                                                                                                                                                                | DA509, 4X backcrossed to N2-CK  |
| LRL222                         | <i>hlh-30(tm1978)IV; unc-13(e1091)I</i>                                                                                                                                                                              | LRL31 x LRL219                  |
| LRL223                         | <i>unc-13(e1091)I; cls4251 [(pSAK2) myo-3p::GFP::LacZ::NLS + (pSAK4) myo-3p::mitochondrial GFP + dpy-20(+)]I</i>                                                                                                     | LRL200 x LRL219                 |
| LRL227                         | <i>hlh-30(tm1978)IV; llcls3(pLP27/rab-3p::hlh-30::GFP::3XFLAG::rab-3 3'UTR + pLP24/unc-122p::RFP); unc-13(e1091)I</i>                                                                                                | LRL147 x LRL222                 |
| LRL228                         | <i>unc-31(e928)IV; cls4251 [(pSAK2) myo-3p::GFP::LacZ::NLS + (pSAK4) myo-3p::mitochondrial GFP + dpy-20(+)]I</i>                                                                                                     | LRL200 x LRL220                 |
| LRL229                         | <i>hlh-30(tm1978)IV; unc-31(e928)IV</i>                                                                                                                                                                              | LRL31 x LRL220                  |
| LRL230                         | <i>hlh-30(tm1978)IV; llcls3(pLP27/rab-3p::hlh-30::GFP::3XFLAG::rab-3 3'UTR + pLP24/unc-122p::RFP); unc-31(e928)IV</i>                                                                                                | LRL147 x LRL229                 |
| LRL231                         | <i>hlh-30(tm1978)IV; cls4251 [(pSAK2) myo-3p::GFP::LacZ::NLS + (pSAK4) myo-3p::mitochondrial GFP + dpy-20(+)]I; W06A11.1(tm4056)II</i>                                                                               | LRL201 x LRL216                 |
| LRL232                         | <i>hlh-30(tm1978)IV; llcls3(pLP27/rab-3p::hlh-30::GFP::3XFLAG::rab-3 3'UTR + pLP24/unc-122p::RFP); cls4251 [(pSAK2) myo-3p::GFP::LacZ::NLS + (pSAK4) myo-3p::mitochondrial GFP + dpy-20(+)]I; W06A11.1(tm4056)II</i> | LRL212 x LRL218                 |
| LRL238                         | <i>hlh-30(tm1978)IV; llcls3(pLP27/rab-3p::hlh-30::GFP::3XFLAG::rab-3 3'UTR + pLP24/unc-122p::RFP); cls4251 [(pSAK2) myo-3p::GFP::LacZ::NLS + (pSAK4) myo-3p::mitochondrial GFP + dpy-20(+)]I; unc-31(e928)IV</i>     | LRL212 x LRL230                 |
| LRL239                         | <i>W06A11.1(tm4056)II; cls4251 [(pSAK2) myo-3p::GFP::LacZ::NLS + (pSAK4) myo-3p::mitochondrial GFP + dpy-20(+)]I</i>                                                                                                 | LRL200 x LRL207                 |
| LRL240                         | <i>hlh-30(tm1978)IV; llcls3(pLP27/rab-3p::hlh-30::GFP::3XFLAG::rab-3 3'UTR + pLP24/unc-122p::RFP); cls4251 [(pSAK2) myo-3p::GFP::LacZ::NLS + (pSAK4) myo-3p::mitochondrial GFP + dpy-20(+)]I; unc-13(e1091)I</i>     | LRL212 x LRL227                 |
| LRL241                         | <i>hlh-30(tm1978)IV; cls4251 [(pSAK2) myo-3p::GFP::LacZ::NLS + (pSAK4) myo-3p::mitochondrial GFP + dpy-20(+)]I; unc-31(e928)IV</i>                                                                                   | LRL201 x LRL229                 |
| LRL242                         | <i>hlh-30(tm1978)IV; cls4251 [(pSAK2) myo-3p::GFP::LacZ::NLS + (pSAK4) myo-3p::mitochondrial GFP + dpy-20(+)]I; unc-13(e1091)I</i>                                                                                   | LRL201 x LRL222                 |

Supplemental Table 4. Strains used in the study

## Supplemental Table 4 (continued)

| New strains used in this study |                                                                                                                                                                 |                                                |
|--------------------------------|-----------------------------------------------------------------------------------------------------------------------------------------------------------------|------------------------------------------------|
| Strain Name                    | Genotype                                                                                                                                                        | Comments                                       |
| LRL244                         | <i>llcEx61 (pLP30/W06A11.1p::W06A11.1::DsRed + pLP7/myo-2p::GFP)</i>                                                                                            | Line 1; Refer to Methods for strain generation |
| LRL245                         | <i>llcEx62 (pLP30/W06A11.1p::W06A11.1::DsRed + pLP7/myo-2p::GFP)</i>                                                                                            | Line 2; Refer to Methods for strain generation |
| LRL247                         | <i>W06A11.1(tm4056)II; unc-13(e1091)I; cls4251 [(pSAK2) myo-3p::GFP::LacZ::NLS + (pSAK4) myo-3p::mitochondrial GFP + dpy-20(+)]I</i>                            | LRL207 x LRL223                                |
| LRL248                         | <i>llcEx61 (pLP30/W06A11.1p::W06A11.1::DsRed + pLP7/myo-2p::GFP); cls4251 [(pSAK2) myo-3p::GFP::LacZ::NLS + (pSAK4) myo-3p::mitochondrial GFP + dpy-20(+)]I</i> | LRL200 x LRL244                                |
| LRL253                         | <i>W06A11.1(tm4056)II; llcEx61 (pLP30/W06A11.1p::W06A11.1::DsRed + pLP7/myo-2p::GFP)</i>                                                                        | LRL207 x LRL244                                |

**Supplemental Table 4. Strains used in the study**



## Supplemental Table 5

| Primers used for cloning |           |                                                                |                                                                                                                                                                                                                                         |
|--------------------------|-----------|----------------------------------------------------------------|-----------------------------------------------------------------------------------------------------------------------------------------------------------------------------------------------------------------------------------------|
| Primer                   | Direction | Sequence (5' to 3')                                            | Purpose                                                                                                                                                                                                                                 |
| LC127                    | Forward   | GGTGGTGGTACCATGGCCGGCGATTATAAGGA                               | Cloning of 3xFLAG-tag from pLP15 (Addgene plasmid #55180) with 5' KpnI and 3' EcoRI sites, for insertion into KpnI/EcoRI-digested pLP9 (Addgene plasmid #1497).                                                                         |
| LC128                    | Reverse   | GGTGGTGAATTCTTAACCGGTCTTGTCTCATCG                              |                                                                                                                                                                                                                                         |
| LC154                    | Forward   | TCAGGAGGACCCTTGAGGGTACGGTACCATGGCCGATGAC                       | Cloning of <i>hlh-30</i> coding sequence from <i>C. elegans</i> cDNA with 5' KpnI and 3' NaeI sites, for insertion into KpnI/NaeI-digested pLP16 (pPD95.81_3xFLAG) vector.                                                              |
| LC155                    | Reverse   | TCATGATCCTTATAATCGCCGAAAAGTCCATGTGATAATGACC                    |                                                                                                                                                                                                                                         |
| LC184                    | Forward   | GCCCGAAAAGTCCATGTGATAATG                                       | Cloning of pPD95.81_3xFLAG, for insertion of LC186/187-amplified GFP sequence between <i>hlh-30</i> and 3xFLAG sequences via HiFi cloning.                                                                                              |
| LC185                    | Reverse   | GATTATAAGGATCATGATGGTG                                         |                                                                                                                                                                                                                                         |
| LC186                    | Forward   | CATTATCACATGGACTTTTCGGGCTCGGGCTCGATGAGTAAAGG<br>AGAAGAAC       | Cloning of GFP sequence from pLP19 (plasmid #836 ( <i>hlh-17p::GFP</i> ) from Dr. Andrew Dillin, UC Berkeley), for insertion between <i>hlh-30</i> and 3xFLAG sequences of LC184/185-amplified pPD95.81_3xFLAG vector via HiFi cloning. |
| LC187                    | Reverse   | CACCATCATGATCCTTATAATCCGAGCCCGAGCCTTTGTATAGTT<br>CATCCATGCCATG |                                                                                                                                                                                                                                         |
| LC143                    | Forward   | GGTGGTGCATGCGATCTTCAGATGGGAGCAGTG                              | Cloning of <i>rab-3</i> promoter from pLP17 (plasmid #462 ( <i>rab-3p::sid-1</i> ) from Dr. Andrew Dillin, UC Berkeley) with 5' SphI and 3' KpnI sites, for insertion into SphI/KpnI-digested pPD95.81_3xFLAG vector.                   |
| LC188                    | Reverse   | GGTGGTGGTACCCTGAAAATAGGGCTACTGTAG                              |                                                                                                                                                                                                                                         |
| LC225                    | Forward   | GCGGCCCTATTATTTTTGACACC                                        | Cloning of pLP21 (pPD95.81_3xFLAG) vector, for replacement of <i>unc-54</i> 3'UTR sequence with LC227/228-amplified <i>rab-3</i> 3'UTR sequence via HiFi cloning.                                                                       |
| LC226                    | Reverse   | CACAAGTATTGATGAGCACGATGC                                       |                                                                                                                                                                                                                                         |
| LC227                    | Forward   | GGTGTCAAAAATAATAGGGGCCGGAAGCTCGAAGCGAATCC                      | Cloning of <i>rab-3</i> 3'UTR from <i>C. elegans</i> gDNA, for replacement of <i>unc-54</i> 3'UTR sequence in LC225/226-amplified pPD95.81_3xFLAG vector via HiFi cloning.                                                              |
| LC228                    | Reverse   | GCATCGTGCTCATCAACTTGTGCAGACCTCTGGAACCTTC                       |                                                                                                                                                                                                                                         |
| LC341                    | Forward   | ATGGTGCCTCTCCAAGAAC                                            | Cloning of pLP26 ( <i>p62p::p62::dsRED</i> ) vector for the replacement of <i>p62p::p62</i> sequences with LC345/346-amplified <i>W06A11.1</i> coding and LC353/354-amplified <i>W06A11.1</i> promoter sequences via HiFi cloning.      |
| LC342                    | Reverse   | GTTAGCGTATCCATCGTTGTGAGTG                                      |                                                                                                                                                                                                                                         |
| LC345                    | Forward   | ATGATCCGGCCATTACCATTTCTTC                                      | Cloning of <i>W06A11.1</i> coding sequence from <i>C. elegans</i> cDNA for the replacement of <i>p62p::p62</i> sequences in LC341/342-amplified pLP26 ( <i>p62p::p62::dsRED</i> ) vector via HiFi cloning.                              |
| LC346                    | Reverse   | GTTCTTGAGGAGCGCACCATCGAGCCGAGCCGAAACGA<br>AGAATTGAGATGAC       |                                                                                                                                                                                                                                         |
| LC353                    | Forward   | CACTCACAACGATGGATACGCTAACGAGAGCGGAAGACGATTT<br>TGGAGATAGACAGTG | Cloning of <i>W06A11.1</i> promoter sequence from <i>C. elegans</i> gDNA for the replacement of <i>p62p::p62</i> sequences in LC341/342-amplified pLP26 ( <i>p62p::p62::dsRED</i> ) vector via HiFi cloning.                            |
| LC354                    | Reverse   | GAAATGGTAATGGCCGGATCATAATGTGTGCTCTGTGATGTAA<br>CTGGC           |                                                                                                                                                                                                                                         |

Supplemental Table 5. Primers used in this study

## Supplemental Table 5 (continued)

| Primers used for genotyping |           |                             |                                                                                                                                                                   |
|-----------------------------|-----------|-----------------------------|-------------------------------------------------------------------------------------------------------------------------------------------------------------------|
| Primer                      | Direction | Sequence (5' to 3')         | Purpose                                                                                                                                                           |
| LC106                       | Forward   | CAGATCCTCCTCTACTTTCC        | Genotyping of <i>hlh-30(tm1978)</i> deletion.<br>WT = 1273 bp, <i>hlh-30(tm1978)</i> = 563 bp                                                                     |
| LC80                        | Reverse   | CTAGCCGATCCGACCGAGAA        |                                                                                                                                                                   |
| LC203                       | Forward   | GCGTACTCCTCATCCAGCGATC      | Amplification of gDNA region with<br><i>daf-2(e1370)</i> point mutation (726 bp)                                                                                  |
| LC204                       | Reverse   | CCATCGAGATCTCGCCGC          |                                                                                                                                                                   |
| LC199                       | Forward   | GAATCCGTATTCCGACGTTCC       | Confirmation of <i>daf-2(e1370)</i> mutation in LC203/204 amplicons by sequencing                                                                                 |
| LC231                       | Forward   | CACTGTCTACCTCTCCTCCTG       | Genotyping of <i>daf-16(mu86)</i> deletion.<br>LC231/232 = WT (693 bp), LC231/233 = <i>daf-16(mu86)</i> ;<br>based on thermocycling conditions used in this study |
| LC232                       | Reverse   | GCGTCAGTTCGATCTGATATGAAC    |                                                                                                                                                                   |
| LC233                       | Reverse   | CGTTATCAAATGCTCCTTGATTGAATC |                                                                                                                                                                   |
| LC294                       | Forward   | GCCCAACATCTTCCAAGCATG       | Amplification of gDNA region with<br><i>unc-13(e1091)</i> point mutation (328 bp) and allele<br>confirmation by sequencing with LC294                             |
| LC295                       | Reverse   | CTCTTCTGTCTTCTTCGTAGCC      |                                                                                                                                                                   |
| LC296                       | Forward   | AACCAAGACGACCGATCAGT        | Genotyping of <i>W06A11.1(tm4056)</i> deletion.<br>WT = 780 bp, <i>W06A11.1(tm4056)</i> = 494 bp                                                                  |
| LC297                       | Reverse   | GGCGCACGAACACACGCATA        |                                                                                                                                                                   |
| LC312                       | Forward   | GCCACAGGTCAAGCCTATAA        | Genotyping of <i>unc-31(e928)</i> deletion.<br>WT = 1197 bp, <i>unc-31(e928)</i> = no product                                                                     |
| LC313                       | Reverse   | TGAGCCGGACTAACATCAATAC      |                                                                                                                                                                   |
| Primers used for qPCR       |           |                             |                                                                                                                                                                   |
| Primer                      | Direction | Sequence (5' to 3')         | Purpose                                                                                                                                                           |
| LL7                         | Forward   | TGGAACTCTGGAGTCACACC        | For comparing expression levels of the housekeeping gene,<br><i>ama-1</i> . Used for normalization.                                                               |
| LL8                         | Reverse   | CATCCTCCTTCAATGAACGG        |                                                                                                                                                                   |
| LL9                         | Forward   | CTGCTGGACAGGAAGATTACG       | For comparing expression levels of the housekeeping gene,<br><i>cdc-42</i> . Used for normalization.                                                              |
| LL10                        | Reverse   | CTCGGACATTCTCGAATGAAG       |                                                                                                                                                                   |
| LL11                        | Forward   | GTTCCCGTGTTCATCACTCAT       | For comparing expression levels of the housekeeping gene,<br><i>pmp-3</i> . Used for normalization.                                                               |
| LL12                        | Reverse   | ACACCGTCGAGAAGCTGTAGA       |                                                                                                                                                                   |
| LL624                       | Forward   | CCGACGAGTTTCGATCGAC         | For comparing <i>hlh-30</i> expression levels                                                                                                                     |
| LL626                       | Reverse   | GTCGGCGTTCAATCATATTGTG      |                                                                                                                                                                   |

**Supplemental Table 5. Primers used in this study**
